# Supplementary material
Source: MDPI journal article supplement (https://www.mdpi.com/2075-5309/9/5/130)
Supplement: s1 [file s1]

## Sheet: Sheet1
Time (s)	Accel * g							Return period	25	500	2500
0.02	3.0612e-05							K1	0.315	0.916	1.648
0.04	0.00015306							k2	1	1	1
0.06	3.0612e-05
0.08	0.00015306
0.1	2.0408e-05
0.12	0.00014286
0.14	2.0408e-05
0.16	0.00014286
0.18	2.0408e-05
0.2	0.00014286
0.22	2.0408e-05
0.24	0.00013265
0.26	1.0204e-05
0.28	0.00013265
0.3	1.0204e-05
0.32	0.00013265
0.34	1.0204e-05
0.36	0.00013265
0.38	0
0.4	0.00012245
0.42	0
0.44	0.00012245
0.46	0
0.48	0.00012245
0.5	-1.0204e-05
0.52	0.00011224
0.54	-1.0204e-05
0.56	0.00011224
0.58	-2.0408e-05
0.6	0.00010204
0.62	-2.0408e-05
0.64	0.00010204
0.66	-2.0408e-05
0.68	0.00010204
0.7	-3.0612e-05
0.72	9.1837e-05
0.74	-3.0612e-05
0.76	9.1837e-05
0.78	-4.0816e-05
0.8	8.1633e-05
0.82	-4.0816e-05
0.84	8.1633e-05
0.86	-4.0816e-05
0.88	7.1429e-05
0.9	-5.102e-05
0.92	7.1429e-05
0.94	-5.102e-05
0.96	7.1429e-05
0.98	-6.1224e-05
1	6.1224e-05
1.02	-6.1224e-05
1.04	6.1224e-05
1.06	-7.1429e-05
1.08	5.102e-05
1.1	-7.1429e-05
1.12	5.102e-05
1.14	-8.1633e-05
1.16	4.0816e-05
1.18	-8.1633e-05
1.2	3.0612e-05
1.22	-9.1837e-05
1.24	3.0612e-05
1.26	-9.1837e-05
1.28	2.0408e-05
1.3	-0.00010204
1.32	2.0408e-05
1.34	-0.00011224
1.36	1.0204e-05
1.38	-0.00011224
1.4	1.0204e-05
1.42	-0.00012245
1.44	0
1.46	-0.00012245
1.48	-1.0204e-05
1.5	-0.00013265
1.52	-1.0204e-05
1.54	-0.00014286
1.56	-2.0408e-05
1.58	-0.00014286
1.6	-3.0612e-05
1.62	-0.00015306
1.64	-3.0612e-05
1.66	-0.00016327
1.68	-4.0816e-05
1.7	-0.00016327
1.72	-4.0816e-05
1.74	-0.00017347
1.76	-5.102e-05
1.78	-0.00018367
1.8	-6.1224e-05
1.82	-0.00018367
1.84	-7.1429e-05
1.86	-0.00019388
1.88	-7.1429e-05
1.9	-0.00020408
1.92	-8.1633e-05
1.94	-0.00020408
1.96	-9.1837e-05
1.98	-0.00021429
2	-9.1837e-05
2.02	-0.00022449
2.04	-0.00010204
2.06	-0.00023469
2.08	-0.00011224
2.1	-0.00023469
2.12	-0.00012245
2.14	-0.0002449
2.16	-0.00013265
2.18	-0.0002551
2.2	-0.00013265
2.22	-0.00026531
2.24	-0.00014286
2.26	-0.00027551
2.28	-0.00015306
2.3	-0.00027551
2.32	-0.00016327
2.34	-0.00028571
2.36	-0.00017347
2.38	-0.00029592
2.4	-0.00017347
2.42	-0.00030612
2.44	-0.00018367
2.46	-0.00031633
2.48	-0.00019388
2.5	-0.00032653
2.52	-0.00020408
2.54	-0.00033673
2.56	-0.00021429
2.58	-0.00033673
2.6	-0.00022449
2.62	-0.00034694
2.64	-0.00023469
2.66	-0.00035714
2.68	-0.0002449
2.7	-0.00036735
2.72	-0.0002449
2.74	-0.00037755
2.76	-0.0002551
2.78	-0.00038776
2.8	-0.00026531
2.82	-0.00039796
2.84	-0.00027551
2.86	-0.00040816
2.88	-0.00028571
2.9	-0.00041837
2.92	-0.00029592
2.94	-0.00042857
2.96	-0.00030612
2.98	-0.00043878
3	-0.00031633
3.02	-0.00044898
3.04	-0.00032653
3.06	-0.00045918
3.08	-0.00033673
3.1	-0.00045918
3.12	-0.00034694
3.14	-0.00046939
3.16	-0.00035714
3.18	-0.00047959
3.2	-0.00036735
3.22	-0.0004898
3.24	-0.00037755
3.26	-0.0005
3.28	-0.00038776
3.3	-0.0005102
3.32	-0.00039796
3.34	-0.00052041
3.36	-0.00040816
3.38	-0.00053061
3.4	-0.00041837
3.42	-0.00054082
3.44	-0.00042857
3.46	-0.00056122
3.48	-0.00043878
3.5	-0.00057143
3.52	-0.00044898
3.54	-0.00058163
3.56	-0.00045918
3.58	-0.00059184
3.6	-0.00046939
3.62	-0.00060204
3.64	-0.00047959
3.66	-0.00061224
3.68	-0.0004898
3.7	-0.00062245
3.72	-0.0005
3.74	-0.00063265
3.76	-0.0005102
3.78	-0.00064286
3.8	-0.00052041
3.82	-0.00065306
3.84	-0.00053061
3.86	-0.00066327
3.88	-0.00054082
3.9	-0.00067347
3.92	-0.00055102
3.94	-0.00068367
3.96	-0.00057143
3.98	-0.00069388
4	-0.00058163
4.02	-0.00070408
4.04	-0.00059184
4.06	-0.00071429
4.08	-0.00060204
4.1	-0.00072449
4.12	-0.00061224
4.14	-0.00073469
4.16	-0.00062245
4.18	-0.0007449
4.2	-0.00063265
4.22	-0.00076531
4.24	-0.00064286
4.26	-0.00077551
4.28	-0.00065306
4.3	-0.00078571
4.32	-0.00066327
4.34	-0.00079592
4.36	-0.00067347
4.38	-0.00080612
4.4	-0.00068367
4.42	-0.00081633
4.44	-0.00069388
4.46	-0.00082653
4.48	-0.00070408
4.5	-0.00083673
4.52	-0.00071429
4.54	-0.00084694
4.56	-0.00072449
4.58	-0.00085714
4.6	-0.0007449
4.62	-0.00086735
4.64	-0.0007551
4.66	-0.00087755
4.68	-0.00076531
4.7	-0.00088776
4.72	-0.00077551
4.74	-0.00089796
4.76	-0.00078571
4.78	-0.00090816
4.8	-0.00079592
4.82	-0.00091837
4.84	-0.00080612
4.86	-0.00092857
4.88	-0.00081633
4.9	-0.00093878
4.92	-0.00082653
4.94	-0.00094898
4.96	-0.00083673
4.98	-0.00095918
5	-0.00084694
5.02	-0.0024796
5.04	-0.011949
5.06	-0.011367
5.08	-0.0099184
5.1	-0.010765
5.12	-0.013194
5.14	-0.015571
5.16	-0.01402
5.18	-0.012316
5.2	-0.0096429
5.22	-0.0097755
5.24	-0.014347
5.26	-0.019071
5.28	-0.020786
5.3	-0.017653
5.32	-0.015694
5.34	-0.012153
5.36	-0.0093776
5.38	-0.0054286
5.4	-0.0077551
5.42	-0.01451
5.44	-0.020418
5.46	-0.021153
5.48	-0.0077755
5.5	0.001898
5.52	0.013337
5.54	-0.0061735
5.56	-0.014112
5.58	-0.015878
5.6	-0.021776
5.62	-0.027724
5.64	-0.034235
5.66	-0.032429
5.68	-0.018633
5.7	-0.021306
5.72	-0.017724
5.74	-0.017949
5.76	-0.0079388
5.78	0.0013265
5.8	0.014204
5.82	0.022847
5.84	0.024602
5.86	0.033041
5.88	0.046122
5.9	0.048959
5.92	0.041622
5.94	0.035378
5.96	0.02652
5.98	0.022714
6	0.033449
6.02	0.040776
6.04	0.052929
6.06	0.063929
6.08	0.073541
6.1	0.065245
6.12	0.059959
6.14	0.039531
6.16	0.039643
6.18	0.0051327
6.2	-0.053724
6.22	-0.081612
6.24	-0.062714
6.26	-0.050694
6.28	-0.026694
6.3	-0.0073367
6.32	0.01248
6.34	0.030112
6.36	0.049714
6.38	0.071122
6.4	0.10033
6.42	0.12306
6.44	0.15481
6.46	0.14652
6.48	0.11664
6.5	0.094071
6.52	0.089796
6.54	0.093143
6.56	0.084388
6.58	0.090592
6.6	0.1001
6.62	0.12201
6.64	0.032235
6.66	-0.15187
6.68	-0.21205
6.7	-0.20432
6.72	-0.20879
6.74	-0.18667
6.76	-0.17727
6.78	-0.18014
6.8	-0.18012
6.82	-0.18555
6.84	-0.16757
6.86	-0.13883
6.88	-0.11217
6.9	-0.081173
6.92	-0.045031
6.94	-0.0031122
6.96	0.03548
6.98	0.078724
7	0.11752
7.02	0.16168
7.04	0.19874
7.06	0.24474
7.08	0.27721
7.1	0.30842
7.12	0.32528
7.14	0.34729
7.16	0.2866
7.18	0.23576
7.2	-0.12351
7.22	-0.24353
7.24	-0.16861
7.26	-0.19169
7.28	-0.11299
7.3	-0.078224
7.32	-0.018908
7.34	0.010153
7.36	0.053133
7.38	0.089949
7.4	0.11977
7.42	0.17791
7.44	0.05752
7.46	-0.26985
7.48	-0.15911
7.5	-0.17781
7.52	-0.10452
7.54	-0.060459
7.56	0.022939
7.58	-0.069735
7.6	-0.20329
7.62	-0.16882
7.64	-0.17318
7.66	-0.15249
7.68	-0.12685
7.7	-0.1035
7.72	-0.077867
7.74	-0.054724
7.76	-0.028888
7.78	-0.0058469
7.8	0.017959
7.82	-0.011041
7.84	-0.045408
7.86	-0.086857
7.88	-0.098255
7.9	-0.074398
7.92	-0.062337
7.94	-0.035418
7.96	-0.012224
7.98	0.017551
8	0.041653
8.02	0.067357
8.04	-0.011092
8.06	-0.039276
8.08	-0.0052653
8.1	-0.00018367
8.12	0.033918
8.14	0.056357
8.16	0.088929
8.18	0.11401
8.2	0.13792
8.22	0.021061
8.24	0.023439
8.26	0.068418
8.28	0.069153
8.3	0.13322
8.32	0.13692
8.34	0.20691
8.36	-0.096133
8.38	-0.13471
8.4	-0.071735
8.42	-0.056959
8.44	0.0062347
8.46	0.067643
8.48	-0.10998
8.5	-0.15306
8.52	-0.11038
8.54	-0.11979
8.56	-0.078837
8.58	-0.058235
8.6	-0.02301
8.62	-0.014041
8.64	-0.069837
8.66	-0.034235
8.68	-0.035439
8.7	-0.012286
8.72	0.00070408
8.74	0.029357
8.76	0.048776
8.78	0.060898
8.8	0.021643
8.82	-0.0043878
8.84	-0.026
8.86	0.0067449
8.88	0.020551
8.9	0.056857
8.92	0.083316
8.94	0.12198
8.96	0.14987
8.98	0.17617
9	0.04202
9.02	0.0019082
9.04	0.0255
9.06	0.028857
9.08	-0.0065204
9.1	-0.01602
9.12	0.013694
9.14	0.02001
9.16	0.050041
9.18	0.064827
9.2	0.096786
9.22	0.11412
9.24	0.14681
9.26	0.16527
9.28	0.19764
9.3	0.18844
9.32	0.20163
9.34	0.17958
9.36	0.12676
9.38	-0.12407
9.4	-0.056082
9.42	-0.040071
9.44	-0.03249
9.46	-0.11496
9.48	-0.17023
9.5	-0.25229
9.52	-0.20736
9.54	-0.18808
9.56	-0.13509
9.58	-0.098776
9.6	-0.033847
9.62	0.014918
9.64	0.082602
9.66	0.13382
9.68	0.18487
9.7	-0.0066735
9.72	-0.017867
9.74	0.028347
9.76	0.04501
9.78	0.099592
9.8	0.14472
9.82	0.18839
9.84	0.25005
9.86	0.17127
9.88	-0.14136
9.9	-0.10259
9.92	-0.11164
9.94	-0.093184
9.96	-0.048357
9.98	-0.12816
10	-0.21589
10.02	-0.16559
10.04	-0.17311
10.06	-0.13384
10.08	-0.11381
10.1	-0.079429
10.12	-0.052459
10.14	-0.056041
10.16	-0.12284
10.18	-0.12387
10.2	-0.11853
10.22	-0.11732
10.24	-0.07351
10.26	-0.056173
10.28	0.0062041
10.3	-0.08248
10.32	-0.16703
10.34	-0.088061
10.36	-0.098337
10.38	-0.040796
10.4	-0.015255
10.42	0.032184
10.44	0.065888
10.46	0.089041
10.48	0.047959
10.5	0.019888
10.52	-0.0029388
10.54	0.0295
10.56	0.045245
10.58	0.079827
10.6	0.10528
10.62	0.13771
10.64	0.16377
10.66	0.18967
10.68	0.13062
10.7	0.065112
10.72	0.020755
10.74	0.031867
10.76	0.03802
10.78	0.050459
10.8	0.023969
10.82	-0.0086939
10.84	-0.017133
10.86	-0.011633
10.88	-0.023337
10.9	-0.025378
10.92	-0.015959
10.94	-0.0070918
10.96	0.015082
10.98	0.038643
11	0.059194
11.02	0.02602
11.04	-0.004051
11.06	-0.043653
11.08	-0.013408
11.1	0.0097449
11.12	0.023653
11.14	-0.013092
11.16	-0.004898
11.18	0.0082653
11.2	0.021663
11.22	0.038898
11.24	0.052296
11.26	0.016163
11.28	-0.0029796
11.3	-0.011153
11.32	0.00081633
11.34	0.007949
11.36	0.003898
11.38	-0.0094694
11.4	-0.0033163
11.42	-0.0013878
11.44	0.0042551
11.46	0.0089388
11.48	-0.0053061
11.5	-0.030724
11.52	-0.042531
11.54	-0.024582
11.56	-0.023633
11.58	-0.017724
11.6	-0.012684
11.62	-0.0014694
11.64	0.021214
11.66	-0.010633
11.68	-0.0087653
11.7	-0.0030612
11.72	-0.010265
11.74	-0.010888
11.76	-0.0095306
11.78	0.0002551
11.8	0.0080408
11.82	0.024459
11.84	0.036847
11.86	0.072449
11.88	0.080133
11.9	0.019306
11.92	-0.026173
11.94	-0.012102
11.96	-0.003602
11.98	0.016796
12	0.005602
12.02	-0.021755
12.04	-0.046929
12.06	-0.043061
12.08	-0.021286
12.1	-0.0037449
12.12	0.017
12.14	0.033316
12.16	0.043551
12.18	0.013235
12.2	-0.01551
12.22	-0.020112
12.24	-0.0075306
12.26	-0.020296
12.28	-0.013122
12.3	-0.0048673
12.32	0.0062857
12.34	0.014439
12.36	0.028041
12.38	0.024459
12.4	0.0089796
12.42	-2.0408e-05
12.44	0.021347
12.46	0.045204
12.48	0.051153
12.5	0.020327
12.52	0.010357
12.54	-0.0013878
12.56	-0.0011531
12.58	0.0061837
12.6	0.0105
12.62	0.026908
12.64	0.038571
12.66	0.05448
12.68	0.056245
12.7	0.044296
12.72	0.041673
12.74	0.05798
12.76	0.078214
12.78	0.038204
12.8	0.043031
12.82	0.010969
12.84	-0.019714
12.86	-0.024418
12.88	-0.040204
12.9	-0.041143
12.92	-0.046929
12.94	-0.043163
12.96	-0.045592
12.98	-0.0047857
13	0.019327
13.02	-0.020184
13.04	-0.049031
13.06	-0.05302
13.08	-0.035755
13.1	-0.040255
13.12	-0.030235
13.14	-0.031163
13.16	-0.025827
13.18	-0.025949
13.2	-0.026224
13.22	-0.034102
13.24	-0.030296
13.26	-0.021031
13.28	-0.0067143
13.3	0.01
13.32	0.029929
13.34	0.032765
13.36	0.037796
13.38	0.035939
13.4	0.037796
13.42	0.030439
13.44	0.032398
13.46	0.012582
13.48	0.023122
13.5	0.015041
13.52	0.04048
13.54	-0.086684
13.56	-0.13636
13.58	-0.13577
13.6	-0.13686
13.62	-0.12055
13.64	-0.10502
13.66	-0.083398
13.68	-0.065112
13.7	-0.044112
13.72	-0.02501
13.74	-0.0049286
13.76	-0.0079592
13.78	-0.017367
13.8	-0.013673
13.82	0.0098776
13.84	0.017959
13.86	0.0063061
13.88	0.028265
13.9	0.060592
13.92	0.089806
13.94	0.12365
13.96	0.1743
13.98	0.11458
14	-0.11091
14.02	-0.036133
14.04	-0.044071
14.06	-0.022878
14.08	-0.096622
14.1	-0.065735
14.12	-0.059592
14.14	-0.067163
14.16	-0.055
14.18	-0.001551
14.2	0.039898
14.22	0.11059
14.24	0.17163
14.26	0.097827
14.28	0.042949
14.3	0.069255
14.32	0.014786
14.34	-0.0085
14.36	-0.051755
14.38	-0.083204
14.4	-0.11624
14.42	-0.11617
14.44	-0.080643
14.46	-0.03648
14.48	0.0042551
14.5	0.056776
14.52	0.12149
14.54	0.16544
14.56	-0.026276
14.58	0.0046224
14.6	-0.004449
14.62	0.0031837
14.64	0.016153
14.66	0.055929
14.68	0.082673
14.7	-0.019796
14.72	-0.058969
14.74	-0.016133
14.76	-0.016633
14.78	-0.0017551
14.8	0.0087653
14.82	0.040071
14.84	0.059061
14.86	0.077918
14.88	0.082929
14.9	0.061469
14.92	0.032204
14.94	0.003398
14.96	0.0076939
14.98	-0.040388
15	-0.044867
15.02	-0.0070408
15.04	0.018286
15.06	0.058867
15.08	0.010612
15.1	-0.0046224
15.12	0.005602
15.14	-0.011571
15.16	-0.027684
15.18	-0.043633
15.2	-0.034847
15.22	-0.025071
15.24	-0.010265
15.26	0.021847
15.28	0.054
15.3	0.088051
15.32	0.11776
15.34	0.075684
15.36	0.025194
15.38	-0.036673
15.4	-0.026663
15.42	-0.021286
15.44	-0.088112
15.46	-0.098449
15.48	-0.059153
15.5	-0.033469
15.52	0.0087857
15.54	0.027224
15.56	0.052745
15.58	0.037612
15.6	0.0091531
15.62	-0.0049592
15.64	-0.020459
15.66	-0.031612
15.68	-0.023439
15.7	-0.037663
15.72	-0.055306
15.74	-0.07299
15.76	-0.081143
15.78	-0.052704
15.8	-0.033918
15.82	-0.00047959
15.84	0.0073878
15.86	-0.0031633
15.88	0.00021429
15.9	-0.016551
15.92	-0.041133
15.94	-0.0075918
15.96	0.0087347
15.98	0.038704
16	0.063408
16.02	0.068378
16.04	0.026551
16.06	-0.0053265
16.08	-0.047765
16.1	-0.035857
16.12	-0.024214
16.14	-0.0044592
16.16	0.013408
16.18	0.039092
16.2	0.025112
16.22	-0.022776
16.24	-0.043173
16.26	-0.068929
16.28	-0.06698
16.3	-0.059867
16.32	-0.051898
16.34	-0.041327
16.36	-0.031112
16.38	-0.026857
16.4	-0.054816
16.42	-0.063827
16.44	-0.092286
16.46	-0.11273
16.48	-0.089561
16.5	-0.078378
16.52	-0.059082
16.54	-0.048092
16.56	-0.033704
16.58	-0.020163
16.6	0.0022959
16.62	0.021643
16.64	0.044306
16.66	0.062633
16.68	0.078459
16.7	0.095265
16.72	0.10894
16.74	0.11534
16.76	0.12127
16.78	0.12724
16.8	0.13623
16.82	0.16262
16.84	0.18345
16.86	0.20781
16.88	0.12617
16.9	0.04502
16.92	-0.014265
16.94	-0.068071
16.96	-0.056633
16.98	-0.070857
17	-0.10044
17.02	-0.12732
17.04	-0.12037
17.06	-0.10734
17.08	-0.093969
17.1	-0.076041
17.12	-0.082673
17.14	-0.08699
17.16	-0.087898
17.18	-0.088347
17.2	-0.089255
17.22	-0.088888
17.24	-0.09051
17.26	-0.055133
17.28	0.0050714
17.3	0.021571
17.32	0.024745
17.34	0.058786
17.36	0.031755
17.38	0.023653
17.4	0.049173
17.42	0.059653
17.44	0.053224
17.46	0.035745
17.48	0.019735
17.5	0.019796
17.52	0.049806
17.54	0.034469
17.56	0.028959
17.58	0.04352
17.6	0.023939
17.62	0.0083878
17.64	0.0073776
17.66	-0.015714
17.68	-0.0083571
17.7	-0.0025816
17.72	0.0071224
17.74	0.0038265
17.76	-0.015347
17.78	-0.032939
17.8	-0.025173
17.82	-0.0035714
17.84	0.017969
17.86	0.042724
17.88	0.044163
17.9	0.05148
17.92	0.046898
17.94	0.048092
17.96	0.01902
17.98	0.021837
18	0.027255
18.02	0.039265
18.04	0.050704
18.06	0.05802
18.08	0.059255
18.1	0.08299
18.12	0.080551
18.14	0.095929
18.16	0.034408
18.18	0.0036633
18.2	-0.013367
18.22	-0.036357
18.24	-0.044306
18.26	-0.043418
18.28	-0.028918
18.3	-0.028541
18.32	0.0066735
18.34	0.042663
18.36	-0.024469
18.38	-0.04052
18.4	-0.0093878
18.42	0.013133
18.44	0.044469
18.46	0.0016837
18.48	-0.072082
18.5	-0.082316
18.52	-0.026582
18.54	-0.014878
18.56	0.0070714
18.58	-0.012857
18.6	-0.026622
18.62	-0.035122
18.64	-0.028469
18.66	-0.031867
18.68	-0.021449
18.7	-0.0080102
18.72	-0.0049286
18.74	0.0095306
18.76	0.029133
18.78	0.033898
18.8	0.096571
18.82	0.090418
18.84	0.017163
18.86	-0.038163
18.88	-0.10254
18.9	-0.083592
18.92	-0.077041
18.94	-0.056255
18.96	-0.034806
18.98	-0.014327
19	0.0020204
19.02	0.013827
19.04	0.050673
19.06	-0.0035306
19.08	-0.051071
19.1	-0.037827
19.12	-0.071694
19.14	-0.053959
19.16	-0.039041
19.18	0.0076633
19.2	0.063296
19.22	0.08449
19.24	0.129
19.26	0.14031
19.28	0.12052
19.3	0.075296
19.32	0.021745
19.34	-0.010327
19.36	-0.024388
19.38	0.0062041
19.4	0.017245
19.42	0.054153
19.44	0.03948
19.46	0.0032347
19.48	-0.009602
19.5	-0.020245
19.52	-0.0032857
19.54	-0.0007551
19.56	-0.013184
19.58	-0.022796
19.6	-0.032163
19.62	-0.053612
19.64	-0.075429
19.66	-0.060449
19.68	-0.028388
19.7	-0.019531
19.72	0.0028367
19.74	0.0086327
19.76	0.012735
19.78	0.021184
19.8	0.043347
19.82	0.0079184
19.84	-0.057163
19.86	-0.058
19.88	-0.026041
19.9	-0.0096327
19.92	0.024265
19.94	0.04048
19.96	0.017337
19.98	-0.0041122
20	-0.026031
20.02	-0.0028878
20.04	0.02398
20.06	0.047837
20.08	0.078673
20.1	0.062122
20.12	0.032561
20.14	-0.0027653
20.16	-0.021112
20.18	-0.026531
20.2	-0.022837
20.22	-0.012551
20.24	0.0039082
20.26	0.023276
20.28	-0.0046531
20.3	-0.023347
20.32	-0.049235
20.34	-0.038337
20.36	-0.021061
20.38	-0.0031224
20.4	0.016194
20.42	-0.0094388
20.44	-0.00063265
20.46	0.022204
20.48	0.037031
20.5	0.060071
20.52	0.051531
20.54	0.042847
20.56	0.03399
20.58	0.050306
20.6	0.065541
20.62	0.06848
20.64	0.016469
20.66	-0.018551
20.68	-0.054847
20.7	-0.068939
20.72	-0.040541
20.74	-0.023827
20.76	-0.0044082
20.78	0.01099
20.8	-0.014082
20.82	-0.036959
20.84	-0.053459
20.86	-0.035306
20.88	-0.023235
20.9	-0.0023265
20.92	0.01352
20.94	0.006051
20.96	-0.0073878
20.98	-0.013316
21	-0.033796
21.02	-0.036357
21.04	-0.010204
21.06	0.0064184
21.08	0.030633
21.1	0.047153
21.12	0.060653
21.14	0.057786
21.16	0.032816
21.18	-0.0084184
21.2	-0.080122
21.22	-0.06299
21.24	-0.04551
21.26	-0.022255
21.28	0.0023673
21.3	0.034806
21.32	0.029122
21.34	0.011459
21.36	0.033735
21.38	0.03148
21.4	0.025184
21.42	0.020173
21.44	0.01949
21.46	0.016929
21.48	0.0014592
21.5	-0.01549
21.52	-0.035663
21.54	-0.035367
21.56	-0.015439
21.58	-0.0036122
21.6	0.016724
21.62	-0.01052
21.64	-0.026612
21.66	-0.029173
21.68	-0.040163
21.7	-0.025378
21.72	-0.02248
21.74	-0.019224
21.76	-0.018276
21.78	-0.0045102
21.8	-0.0032551
21.82	-0.01948
21.84	-0.01302
21.86	0.0082959
21.88	0.034551
21.9	0.070367
21.92	0.092439
21.94	0.08651
21.96	0.077153
21.98	0.051847
22	0.018612
22.02	0.001051
22.04	-0.019735
22.06	-0.015857
22.08	-0.0077653
22.1	0.0017143
22.12	0.012878
22.14	0.021541
22.16	0.0021837
22.18	-0.013031
22.2	-0.033806
22.22	-0.053306
22.24	-0.072459
22.26	-0.059408
22.28	-0.047327
22.3	-0.031622
22.32	-0.014959
22.34	-0.0011837
22.36	-0.0185
22.38	-0.032694
22.4	-0.047551
22.42	-0.040112
22.44	-0.035286
22.46	-0.032439
22.48	-0.044439
22.5	-0.050265
22.52	-0.0485
22.54	-0.04299
22.56	-0.036837
22.58	-0.028378
22.6	-0.026296
22.62	-0.014265
22.64	-0.0068878
22.66	0.051673
22.68	0.073755
22.7	0.089561
22.72	0.079898
22.74	0.078051
22.76	0.044929
22.78	0.0081837
22.8	0.0014796
22.82	-0.012816
22.84	-0.0013469
22.86	0.0031327
22.88	0.010816
22.9	0.010704
22.92	0.019929
22.94	0.021041
22.96	0.0078061
22.98	-0.0055714
23	-0.0070612
23.02	0.0073163
23.04	0.011122
23.06	0.015194
23.08	-0.00059184
23.1	-0.016
23.12	-0.018724
23.14	-0.00046939
23.16	0.016194
23.18	0.01098
23.2	-0.011337
23.22	-0.030531
23.24	-0.031102
23.26	-0.0093776
23.28	-0.0054694
23.3	0.0007449
23.32	0.0025102
23.34	0.0054592
23.36	0.0063061
23.38	0.010276
23.4	0.014194
23.42	0.018469
23.44	0.022786
23.46	0.027061
23.48	0.031378
23.5	0.035755
23.52	0.039969
23.54	0.048837
23.56	0.040704
23.58	0.024776
23.6	0.012357
23.62	-0.007551
23.64	-0.01201
23.66	0.0060408
23.68	0.0034184
23.7	-0.024959
23.72	-0.057071
23.74	-0.063714
23.76	-0.059602
23.78	-0.041561
23.8	-0.0062245
23.82	0.028357
23.84	0.029
23.86	-0.0015204
23.88	-0.0053673
23.9	-0.010582
23.92	-0.021776
23.94	-0.041796
23.96	-0.052173
23.98	-0.02198
24	0.0038673
24.02	0.0087449
24.04	0.015
24.06	0.018153
24.08	0.026653
24.1	0.033673
24.12	0.040745
24.14	0.017469
24.16	-0.01301
24.18	-0.032214
24.2	-0.028816
24.22	-0.02852
24.24	-0.030133
24.26	-0.033816
24.28	-0.024092
24.3	-0.0069694
24.32	0.013673
24.34	0.039163
24.36	0.041949
24.38	0.025816
24.4	0.016857
24.42	-0.0032551
24.44	-0.014663
24.46	-0.028653
24.48	-0.031286
24.5	-0.01048
24.52	0.010561
24.54	0.035041
24.56	0.059755
24.58	0.044133
24.6	0.015582
24.62	0.00015306
24.64	-0.012776
24.66	-0.026673
24.68	-0.033786
24.7	-0.035541
24.72	-0.039398
24.74	-0.040122
24.76	-0.048776
24.78	-0.048082
24.8	-0.040398
24.82	-0.040622
24.84	-0.034786
24.86	-0.018173
24.88	-0.0047755
24.9	0.0054082
24.92	-0.00089796
24.94	-0.0064286
24.96	-0.016194
24.98	-0.010806
25	0.013908
25.02	0.037459
25.04	0.067786
25.06	0.07399
25.08	0.078806
25.1	0.076337
25.12	0.065143
25.14	0.050327
25.16	0.028
25.18	-0.003551
25.2	-0.028327
25.22	-0.038245
25.24	-0.049143
25.26	-0.042735
25.28	-0.041388
25.3	-0.027224
25.32	-0.0042449
25.34	0.025122
25.36	0.044531
25.38	0.062571
25.4	0.047184
25.42	0.029908
25.44	0.013908
25.46	-0.0045816
25.48	-0.02701
25.5	-0.042235
25.52	-0.016806
25.54	0.0010306
25.56	0.026969
25.58	0.05
25.6	0.066449
25.62	0.057449
25.64	0.043184
25.66	0.019684
25.68	-0.0038673
25.7	-0.03001
25.72	-0.053153
25.74	-0.071347
25.76	-0.093673
25.78	-0.087163
25.8	-0.063367
25.82	-0.03748
25.84	0.0098878
25.86	0.032408
25.88	0.061102
25.9	0.063531
25.92	0.040276
25.94	0.036684
25.96	0.032724
25.98	0.025959
26	0.0029184
26.02	-0.019357
26.04	-0.015153
26.06	-0.00069388
26.08	0.011061
26.1	0.03002
26.12	0.042582
26.14	0.058276
26.16	0.055122
26.18	0.032857
26.2	0.017765
26.22	-0.0016429
26.24	-0.018367
26.26	-0.027367
26.28	-0.036949
26.3	-0.045143
26.32	-0.053592
26.34	-0.04852
26.36	-0.037786
26.38	-0.029449
26.4	-0.019122
26.42	-0.018031
26.44	-0.015367
26.46	-0.011408
26.48	-0.0045612
26.5	0.00091837
26.52	0.0068571
26.54	-0.0016429
26.56	-0.010602
26.58	-0.020224
26.6	-0.032051
26.62	-0.038918
26.64	-0.034
26.66	-0.028622
26.68	-0.032694
26.7	-0.040878
26.72	-0.048929
26.74	-0.056816
26.76	-0.064959
26.78	-0.05601
26.8	-0.044776
26.82	-0.00021429
26.84	0.026541
26.86	0.042531
26.88	0.066418
26.9	0.059653
26.92	0.049061
26.94	0.039745
26.96	0.039959
26.98	0.035235
27	0.037092
27.02	0.0013469
27.04	-0.025276
27.06	-0.046429
27.08	-0.047439
27.1	-0.022153
27.12	-0.0060204
27.14	0.017214
27.16	0.036816
27.18	0.051888
27.2	0.038439
27.22	0.02902
27.24	0.016684
27.26	0.0046122
27.28	-0.0022143
27.3	0.002551
27.32	0.0050204
27.34	0.0105
27.36	0.014286
27.38	0.0099694
27.4	0.0064082
27.42	0.002602
27.44	-0.0026837
27.46	-0.0028163
27.48	0.00086735
27.5	-0.0022245
27.52	-0.012214
27.54	-0.023673
27.56	-0.041
27.58	-0.053786
27.6	-0.071122
27.62	-0.032684
27.64	-0.0049184
27.66	0.0098469
27.68	0.033847
27.7	0.04902
27.72	0.052296
27.74	0.036755
27.76	0.035235
27.78	0.031429
27.8	0.029408
27.82	0.027031
27.84	0.017449
27.86	-0.00033673
27.88	-0.021347
27.9	-0.037092
27.92	-0.031367
27.94	-0.030163
27.96	-0.028316
27.98	-0.024061
28	-0.026908
28.02	-0.031327
28.04	-0.037133
28.06	-0.036337
28.08	-0.031224
28.1	-0.019622
28.12	0.0021224
28.14	0.020051
28.16	0.0165
28.18	0.013204
28.2	0.014439
28.22	0.011245
28.24	0.011153
28.26	0.009398
28.28	0.0092041
28.3	0.0019286
28.32	-0.013265
28.34	-0.025235
28.36	-0.044398
28.38	-0.044122
28.4	-0.030541
28.42	-0.019653
28.44	-0.0048367
28.46	0.0098265
28.48	0.017184
28.5	0.01501
28.52	0.017684
28.54	0.0078571
28.56	-0.0059082
28.58	-0.022061
28.6	-0.023878
28.62	0.0059898
28.64	0.026714
28.66	0.027306
28.68	0.0085408
28.7	-0.0043469
28.72	-0.023204
28.74	-0.0079286
28.76	0.003102
28.78	0.018378
28.8	0.031561
28.82	0.048673
28.84	0.046745
28.86	0.016724
28.88	-0.0060204
28.9	-0.040643
28.92	-0.045418
28.94	-0.024837
28.96	-0.010429
28.98	0.021888
29	0.02649
29.02	0.012082
29.04	0.00066327
29.06	-0.017418
29.08	-0.039143
29.1	-0.058051
29.12	-0.079867
29.14	-0.063469
29.16	-0.026306
29.18	0.0041735
29.2	0.046337
29.22	0.079571
29.24	0.11235
29.26	0.096908
29.28	0.049684
29.3	0.012102
29.32	-0.039714
29.34	-0.086684
29.36	-0.12534
29.38	-0.088531
29.4	-0.063102
29.42	-0.023643
29.44	0.015051
29.46	0.048286
29.48	0.032694
29.5	0.024908
29.52	0.0094184
29.54	0.022755
29.56	0.034204
29.58	0.051122
29.6	0.060316
29.62	0.052541
29.64	0.05602
29.66	0.060286
29.68	0.062653
29.7	0.060071
29.72	0.047235
29.74	0.015684
29.76	-0.0081837
29.78	-0.023918
29.8	-0.031245
29.82	-0.034031
29.84	-0.03748
29.86	-0.050459
29.88	-0.067694
29.9	-0.074245
29.92	-0.080347
29.94	-0.086806
29.96	-0.058112
29.98	-0.021806
30	0.012704
30.02	0.038388
30.04	0.049429
30.06	0.036551
30.08	0.025143
30.1	0.015622
30.12	0.038092
30.14	0.060112
30.16	0.063908
30.18	0.037255
30.2	0.021765
30.22	0.0035714
30.24	0.0019592
30.26	-0.0068367
30.28	-0.029571
30.3	-0.039286
30.32	-0.04702
30.34	-0.052051
30.36	-0.079684
30.38	-0.064602
30.4	-0.019684
30.42	0.018765
30.44	0.051541
30.46	0.075398
30.48	0.076031
30.5	0.056827
30.52	0.046031
30.54	0.053041
30.56	0.064388
30.58	0.074061
30.6	0.086429
30.62	0.094061
30.64	0.099082
30.66	0.094265
30.68	0.082653
30.7	0.026408
30.72	-0.029898
30.74	-0.092469
30.76	-0.13959
30.78	-0.088184
30.8	-0.048163
30.82	0.0077347
30.84	0.060204
30.86	0.083449
30.88	0.056327
30.9	0.030184
30.92	-0.0015306
30.94	-0.039306
30.96	-0.035816
30.98	-0.0025714
31	0.017969
31.02	0.064071
31.04	0.10297
31.06	0.11397
31.08	0.11256
31.1	0.095398
31.12	0.081745
31.14	0.06152
31.16	0.051439
31.18	0.0205
31.2	-0.020898
31.22	-0.058878
31.24	-0.10457
31.26	-0.13643
31.28	-0.12539
31.3	-0.12367
31.32	-0.10304
31.34	-0.078265
31.36	-0.056296
31.38	-0.050398
31.4	-0.041704
31.42	-0.030194
31.44	-0.018337
31.46	-0.014888
31.48	-0.010367
31.5	-0.0055918
31.52	0.0015714
31.54	0.0076735
31.56	0.0032041
31.58	-0.0034388
31.6	-0.0065816
31.62	-0.003949
31.64	-0.0016837
31.66	0.0072755
31.68	0.020571
31.7	0.032898
31.72	0.045571
31.74	0.058408
31.76	0.05701
31.78	0.046888
31.8	0.030276
31.82	0.010459
31.84	-0.00073469
31.86	-0.0038163
31.88	-0.0073673
31.9	-0.010755
31.92	-0.020837
31.94	-0.019622
31.96	0.0022347
31.98	0.013235
32	0.02448
32.02	0.026714
32.04	0.026735
32.06	0.015388
32.08	-0.0022347
32.1	-0.010112
32.12	-0.022337
32.14	-0.017459
32.16	-0.012531
32.18	-0.0069388
32.2	-0.013449
32.22	-0.017041
32.24	-0.019969
32.26	-0.025092
32.28	-0.024357
32.3	-0.018255
32.32	-0.012918
32.34	-0.019265
32.36	-0.027306
32.38	-0.033337
32.4	-0.034541
32.42	-0.046704
32.44	-0.044133
32.46	-0.034449
32.48	-0.02198
32.5	-0.0074082
32.52	0.0028265
32.54	-5.102e-05
32.56	-0.0097245
32.58	-0.0094388
32.6	-0.015531
32.62	-0.017082
32.64	-0.02451
32.66	-0.033306
32.68	-0.043173
32.7	-0.046969
32.72	-0.040724
32.74	-0.035939
32.76	-0.026531
32.78	-0.017878
32.8	-0.0022347
32.82	0.015602
32.84	0.028786
32.86	0.036622
32.88	0.035939
32.9	0.027143
32.92	0.010122
32.94	-0.004898
32.96	-0.012929
32.98	-0.025296
33	-0.023541
33.02	-0.013143
33.04	-0.007102
33.06	0.001551
33.08	0.0093265
33.1	0.020133
33.12	0.029031
33.14	0.036969
33.16	0.031582
33.18	0.018204
33.2	0.0023061
33.22	-0.016184
33.24	-0.032684
33.26	-0.022602
33.28	-0.012173
33.3	0.0012755
33.32	0.01549
33.34	0.030163
33.36	0.024673
33.38	0.013633
33.4	0.010296
33.42	0.0022143
33.44	-0.0011327
33.46	-0.0025816
33.48	-0.0037755
33.5	-0.0051224
33.52	-0.0091837
33.54	-0.016041
33.56	-0.015204
33.58	-0.0079694
33.6	-9.1837e-05
33.62	-0.0022551
33.64	-0.015194
33.66	-0.023173
33.68	-0.038245
33.7	-0.037449
33.72	-0.025694
33.74	-0.016939
33.76	-0.0015
33.78	0.015418
33.8	0.030745
33.82	0.039908
33.84	0.041357
33.86	0.039102
33.88	0.03351
33.9	0.01849
33.92	0.012694
33.94	0.0069592
33.96	-0.00015306
33.98	-0.0071122
34	-0.013316
34.02	-0.013235
34.04	-0.011786
34.06	-0.010582
34.08	-0.0086122
34.1	-0.014551
34.12	-0.020959
34.14	-0.027612
34.16	-0.035755
34.18	-0.036796
34.2	-0.030337
34.22	-0.023316
34.24	0.0018061
34.26	0.009949
34.28	0.020684
34.3	0.025969
34.32	0.020286
34.34	0.016184
34.36	0.010898
34.38	0.015776
34.4	0.020184
34.42	0.024551
34.44	0.014367
34.46	0.0054694
34.48	-0.0067449
34.5	-0.010031
34.52	-0.0026633
34.54	0.0015
34.56	0.010194
34.58	0.0094592
34.6	0.0039694
34.62	-0.00013265
34.64	-0.0067449
34.66	-0.010224
34.68	-0.011122
34.7	-0.011857
34.72	-0.013367
34.74	-0.017265
34.76	-0.020306
34.78	-0.010735
34.8	-0.0010204
34.82	0.0054898
34.84	0.013163
34.86	0.020286
34.88	0.020316
34.9	0.017133
34.92	0.014602
34.94	0.01101
34.96	0.013071
34.98	0.015398
35	0.01399
35.02	0.011827
35.04	0.0099082
35.06	0.0060102
35.08	-0.0028469
35.1	-0.0052143
35.12	-0.0085612
35.14	-0.018276
35.16	-0.032735
35.18	-0.042959
35.2	-0.052837
35.22	-0.048265
35.24	-0.040184
35.26	-0.029694
35.28	-0.011204
35.3	0.005
35.32	0.01349
35.34	0.015918
35.36	0.018082
35.38	0.019796
35.4	0.026041
35.42	0.033673
35.44	0.03349
35.46	0.025612
35.48	0.017673
35.5	0.0044898
35.52	-0.0086531
35.54	-0.01949
35.56	-0.023347
35.58	-0.031122
35.6	-0.028245
35.62	-0.023265
35.64	-0.017724
35.66	-0.012449
35.68	-0.012827
35.7	-0.013255
35.72	-0.0081327
35.74	-0.0027449
35.76	0.0040102
35.78	0.0065408
35.8	0.0056429
35.82	0.0050102
35.84	0.0065612
35.86	0.012765
35.88	0.018296
35.9	0.024704
35.92	0.031357
35.94	0.030316
35.96	0.025643
35.98	0.021949
36	0.016663
36.02	0.0195
36.04	0.023908
36.06	0.028684
36.08	0.030745
36.1	0.019908
36.12	0.010847
36.14	-0.0040714
36.16	-0.016602
36.18	-0.032949
36.2	-0.034153
36.22	-0.022439
36.24	-0.015071
36.26	-0.0011122
36.28	0.0011531
36.3	-0.0055
36.32	-0.010276
36.34	-0.012949
36.36	-0.014561
36.38	-0.013255
36.4	-0.010582
36.42	-0.0073367
36.44	-0.0018061
36.46	0.0032755
36.48	0.0087041
36.5	0.016031
36.52	0.024429
36.54	0.032459
36.56	0.034837
36.58	0.032367
36.6	0.021776
36.62	0.0073673
36.64	0.00095918
36.66	-0.0016122
36.68	-0.0047551
36.7	-0.0077347
36.72	-0.012306
36.74	-0.016
36.76	-0.011796
36.78	-0.0057959
36.8	-0.00057143
36.82	-0.00038776
36.84	-0.00026531
36.86	0.0013469
36.88	0.0047347
36.9	0.0072653
36.92	0.0088163
36.94	0.0099184
36.96	0.012694
36.98	0.014918
37	0.017602
37.02	0.020337
37.04	0.026173
37.06	0.032276
37.08	0.029337
37.1	0.0235
37.12	0.010765
37.14	-0.00017347
37.16	-0.0010714
37.18	-0.0037449
37.2	-0.0053571
37.22	-0.0085408
37.24	-0.0052551
37.26	-0.00078571
37.28	0.0038265
37.3	0.0097245
37.32	0.015878
37.34	0.020857
37.36	0.014653
37.38	0.0073878
37.4	0.0022041
37.42	-0.0023061
37.44	-0.0070816
37.46	-0.010265
37.48	-0.0075918
37.5	-0.0055714
37.52	-0.002898
37.54	-0.0015816
37.56	7.1429e-05
37.58	-0.00015306
37.6	-0.00054082
37.62	-0.0011735
37.64	-0.00094898
37.66	-0.00035714
37.68	0.00017347
37.7	0.0015816
37.72	0.0054898
37.74	0.0087347
37.76	0.012939
37.78	0.015673
37.8	0.013449
37.82	0.010367
37.84	0.0057959
37.86	0.00057143
37.88	-0.0039898
37.9	-0.010031
37.92	-0.0097041
37.94	-0.0047245
37.96	-0.00062245
37.98	0.0031327
38	0.0046837
38.02	0.0069082
38.04	0.0054082
38.06	0.0045714
38.08	0.0019388
38.1	-0.00022449
38.12	-0.0028571
38.14	-0.0028776
38.16	-0.0016327
38.18	-0.00062245
38.2	-0.00039796
38.22	-0.0017449
38.24	-0.0021327
38.26	-0.0036837
38.28	-0.0031531
38.3	-0.00071429
38.32	0.001551
38.34	0.0041837
38.36	0.0067551
38.38	0.0064286
38.4	0.0054286
38.42	0.00062245
38.44	-0.0044592
38.46	-0.0077449
38.48	-0.006398
38.5	-0.0066224
38.52	-0.010786
38.54	-0.016408
38.56	-0.017612
38.58	-0.011918
38.6	-0.007
38.62	-0.0036531
38.64	-0.002398
38.66	-0.00017347
38.68	0.00056122
38.7	0.0037041
38.72	0.0085204
38.74	0.011765
38.76	0.0073061
38.78	0.0039184
38.8	-0.00085714
38.82	-0.0025102
38.84	-0.0033061
38.86	-0.0041327
38.88	-0.0044184
38.9	-0.0065816
38.92	-0.012071
38.94	-0.011888
38.96	-0.010837
38.98	-0.0099388
39	-0.0080816
39.02	-0.0076939
39.04	-0.011041
39.06	-0.01401
39.08	-0.016745
39.1	-0.014622
39.12	-0.013071
39.14	-0.011255
39.16	-0.010816
39.18	-0.0099184
39.2	-0.0097959
39.22	-0.0063469
39.24	0
39.26	0.005602
39.28	0.011439
39.3	0.015602
39.32	0.020316
39.34	0.017439
39.36	0.01451
39.38	0.010612
39.4	0.0067551
39.42	0.0011224
39.44	-0.006602
39.46	-0.010602
39.48	-0.012214
39.5	-0.013969
39.52	-0.016704
39.54	-0.021827
39.56	-0.027204
39.58	-0.027837
39.6	-0.021898
39.62	-0.018041
39.64	-0.011582
39.66	-0.0060918
39.68	0.0002551
39.7	0.0056429
39.72	0.010357
39.74	0.014827
39.76	0.019347
39.78	0.023816
39.8	0.027
39.82	0.026163
39.84	0.023439
39.86	0.017602
39.88	0.013235
39.9	0.0056633
39.92	-0.0045204
39.94	-0.015051
39.96	-0.021143
39.98	-0.025755
[truncated: 1,175 more rows]

## Sheet: 25 year 
0.02	9.64278e-06
0.04	4.82139e-05
0.06	9.64278e-06
0.08	4.82139e-05
0.1	6.42852e-06
0.12	4.50009e-05
0.14	6.42852e-06
0.16	4.50009e-05
0.18	6.42852e-06
0.2	4.50009e-05
0.22	6.42852e-06
0.24	4.17847e-05
0.26	3.21426e-06
0.28	4.17847e-05
0.3	3.21426e-06
0.32	4.17847e-05
0.34	3.21426e-06
0.36	4.17847e-05
0.38	0
0.4	3.85717e-05
0.42	0
0.44	3.85717e-05
0.46	0
0.48	3.85717e-05
0.5	-3.21426e-06
0.52	3.53556e-05
0.54	-3.21426e-06
0.56	3.53556e-05
0.58	-6.42852e-06
0.6	3.21426e-05
0.62	-6.42852e-06
0.64	3.21426e-05
0.66	-6.42852e-06
0.68	3.21426e-05
0.7	-9.64278e-06
0.72	2.89287e-05
0.74	-9.64278e-06
0.76	2.89287e-05
0.78	-1.2857e-05
0.8	2.57144e-05
0.82	-1.2857e-05
0.84	2.57144e-05
0.86	-1.2857e-05
0.88	2.25001e-05
0.9	-1.60713e-05
0.92	2.25001e-05
0.94	-1.60713e-05
0.96	2.25001e-05
0.98	-1.92856e-05
1	1.92856e-05
1.02	-1.92856e-05
1.04	1.92856e-05
1.06	-2.25001e-05
1.08	1.60713e-05
1.1	-2.25001e-05
1.12	1.60713e-05
1.14	-2.57144e-05
1.16	1.2857e-05
1.18	-2.57144e-05
1.2	9.64278e-06
1.22	-2.89287e-05
1.24	9.64278e-06
1.26	-2.89287e-05
1.28	6.42852e-06
1.3	-3.21426e-05
1.32	6.42852e-06
1.34	-3.53556e-05
1.36	3.21426e-06
1.38	-3.53556e-05
1.4	3.21426e-06
1.42	-3.85717e-05
1.44	0
1.46	-3.85717e-05
1.48	-3.21426e-06
1.5	-4.17847e-05
1.52	-3.21426e-06
1.54	-4.50009e-05
1.56	-6.42852e-06
1.58	-4.50009e-05
1.6	-9.64278e-06
1.62	-4.82139e-05
1.64	-9.64278e-06
1.66	-5.143e-05
1.68	-1.2857e-05
1.7	-5.143e-05
1.72	-1.2857e-05
1.74	-5.46431e-05
1.76	-1.60713e-05
1.78	-5.7856e-05
1.8	-1.92856e-05
1.82	-5.7856e-05
1.84	-2.25001e-05
1.86	-6.10722e-05
1.88	-2.25001e-05
1.9	-6.42852e-05
1.92	-2.57144e-05
1.94	-6.42852e-05
1.96	-2.89287e-05
1.98	-6.75014e-05
2	-2.89287e-05
2.02	-7.07143e-05
2.04	-3.21426e-05
2.06	-7.39273e-05
2.08	-3.53556e-05
2.1	-7.39273e-05
2.12	-3.85717e-05
2.14	-7.71435e-05
2.16	-4.17847e-05
2.18	-8.03565e-05
2.2	-4.17847e-05
2.22	-8.35726e-05
2.24	-4.50009e-05
2.26	-8.67857e-05
2.28	-4.82139e-05
2.3	-8.67857e-05
2.32	-5.143e-05
2.34	-8.99987e-05
2.36	-5.46431e-05
2.38	-9.32148e-05
2.4	-5.46431e-05
2.42	-9.64278e-05
2.44	-5.7856e-05
2.46	-9.96439e-05
2.48	-6.10722e-05
2.5	-0.000102857
2.52	-6.42852e-05
2.54	-0.00010607
2.56	-6.75014e-05
2.58	-0.00010607
2.6	-7.07143e-05
2.62	-0.000109286
2.64	-7.39273e-05
2.66	-0.000112499
2.68	-7.71435e-05
2.7	-0.000115715
2.72	-7.71435e-05
2.74	-0.000118928
2.76	-8.03565e-05
2.78	-0.000122144
2.8	-8.35726e-05
2.82	-0.000125357
2.84	-8.67857e-05
2.86	-0.00012857
2.88	-8.99987e-05
2.9	-0.000131787
2.92	-9.32148e-05
2.94	-0.000135
2.96	-9.64278e-05
2.98	-0.000138216
3	-9.96439e-05
3.02	-0.000141429
3.04	-0.000102857
3.06	-0.000144642
3.08	-0.00010607
3.1	-0.000144642
3.12	-0.000109286
3.14	-0.000147858
3.16	-0.000112499
3.18	-0.000151071
3.2	-0.000115715
3.22	-0.000154287
3.24	-0.000118928
3.26	-0.0001575
3.28	-0.000122144
3.3	-0.000160713
3.32	-0.000125357
3.34	-0.000163929
3.36	-0.00012857
3.38	-0.000167142
3.4	-0.000131787
3.42	-0.000170358
3.44	-0.000135
3.46	-0.000176784
3.48	-0.000138216
3.5	-0.00018
3.52	-0.000141429
3.54	-0.000183213
3.56	-0.000144642
3.58	-0.00018643
3.6	-0.000147858
3.62	-0.000189643
3.64	-0.000151071
3.66	-0.000192856
3.68	-0.000154287
3.7	-0.000196072
3.72	-0.0001575
3.74	-0.000199285
3.76	-0.000160713
3.78	-0.000202501
3.8	-0.000163929
3.82	-0.000205714
3.84	-0.000167142
3.86	-0.00020893
3.88	-0.000170358
3.9	-0.000212143
3.92	-0.000173571
3.94	-0.000215356
3.96	-0.00018
3.98	-0.000218572
4	-0.000183213
4.02	-0.000221785
4.04	-0.00018643
4.06	-0.000225001
4.08	-0.000189643
4.1	-0.000228214
4.12	-0.000192856
4.14	-0.000231427
4.16	-0.000196072
4.18	-0.000234643
4.2	-0.000199285
4.22	-0.000241073
4.24	-0.000202501
4.26	-0.000244286
4.28	-0.000205714
4.3	-0.000247499
4.32	-0.00020893
4.34	-0.000250715
4.36	-0.000212143
4.38	-0.000253928
4.4	-0.000215356
4.42	-0.000257144
4.44	-0.000218572
4.46	-0.000260357
4.48	-0.000221785
4.5	-0.00026357
4.52	-0.000225001
4.54	-0.000266786
4.56	-0.000228214
4.58	-0.000269999
4.6	-0.000234643
4.62	-0.000273215
4.64	-0.000237857
4.66	-0.000276428
4.68	-0.000241073
4.7	-0.000279644
4.72	-0.000244286
4.74	-0.000282857
4.76	-0.000247499
4.78	-0.00028607
4.8	-0.000250715
4.82	-0.000289287
4.84	-0.000253928
4.86	-0.0002925
4.88	-0.000257144
4.9	-0.000295716
4.92	-0.000260357
4.94	-0.000298929
4.96	-0.00026357
4.98	-0.000302142
5	-0.000266786
5.02	-0.000781074
5.04	-0.00376393
5.06	-0.00358061
5.08	-0.0031243
5.1	-0.00339098
5.12	-0.00415611
5.14	-0.00490486
5.16	-0.0044163
5.18	-0.00387954
5.2	-0.00303751
5.22	-0.00307928
5.24	-0.00451931
5.26	-0.00600737
5.28	-0.00654759
5.3	-0.00556069
5.32	-0.00494361
5.34	-0.0038282
5.36	-0.00295394
5.38	-0.00171001
5.4	-0.00244286
5.42	-0.00457065
5.44	-0.00643167
5.46	-0.0066632
5.48	-0.00244928
5.5	0.00059787
5.52	0.00420115
5.54	-0.00194465
5.56	-0.00444528
5.58	-0.00500157
5.6	-0.00685944
5.62	-0.00873306
5.64	-0.010784
5.66	-0.0102151
5.68	-0.0058694
5.7	-0.00671139
5.72	-0.00558306
5.74	-0.00565393
5.76	-0.00250072
5.78	0.000417848
5.8	0.00447426
5.82	0.0071968
5.84	0.00774963
5.86	0.0104079
5.88	0.0145284
5.9	0.0154221
5.92	0.0131109
5.94	0.0111441
5.96	0.0083538
5.98	0.00715491
6	0.0105364
6.02	0.0128444
6.04	0.0166726
6.06	0.0201376
6.08	0.0231654
6.1	0.0205522
6.12	0.0188871
6.14	0.0124523
6.16	0.0124875
6.18	0.0016168
6.2	-0.0169231
6.22	-0.0257078
6.24	-0.0197549
6.26	-0.0159686
6.28	-0.00840861
6.3	-0.00231106
6.32	0.0039312
6.34	0.00948528
6.36	0.0156599
6.38	0.0224034
6.4	0.0316039
6.42	0.0387639
6.44	0.0487652
6.46	0.0461538
6.48	0.0367416
6.5	0.0296324
6.52	0.0282857
6.54	0.02934
6.56	0.0265822
6.58	0.0285365
6.6	0.0315315
6.62	0.0384331
6.64	0.010154
6.66	-0.0478391
6.68	-0.0667958
6.7	-0.0643608
6.72	-0.0657689
6.74	-0.0588011
6.76	-0.0558401
6.78	-0.0567441
6.8	-0.0567378
6.82	-0.0584483
6.84	-0.0527845
6.86	-0.0437315
6.88	-0.0353336
6.9	-0.0255695
6.92	-0.0141848
6.94	-0.000980343
6.96	0.0111762
6.98	0.0247981
7	0.0370188
7.02	0.0509292
7.04	0.0626031
7.06	0.0770931
7.08	0.0873212
7.1	0.0971523
7.12	0.102463
7.14	0.109396
7.16	0.090279
7.18	0.0742644
7.2	-0.0389056
7.22	-0.076712
7.24	-0.0531122
7.26	-0.0603824
7.28	-0.0355919
7.3	-0.0246406
7.32	-0.00595602
7.34	0.0031982
7.36	0.0167369
7.38	0.0283339
7.4	0.0377275
7.42	0.0560417
7.44	0.0181188
7.46	-0.0850027
7.48	-0.0501197
7.5	-0.0560102
7.52	-0.0329238
7.54	-0.0190446
7.56	0.00722579
7.58	-0.0219665
7.6	-0.0640364
7.62	-0.0531783
7.64	-0.0545517
7.66	-0.0480343
7.68	-0.0399578
7.7	-0.0326025
7.72	-0.0245281
7.74	-0.0172381
7.76	-0.00909972
7.78	-0.00184177
7.8	0.00565709
7.82	-0.00347792
7.84	-0.0143035
7.86	-0.02736
7.88	-0.0309503
7.9	-0.0234354
7.92	-0.0196362
7.94	-0.0111567
7.96	-0.00385056
7.98	0.00552857
8	0.0131207
8.02	0.0212175
8.04	-0.00349398
8.06	-0.0123719
8.08	-0.00165857
8.1	-5.7856e-05
8.12	0.0106842
8.14	0.0177525
8.16	0.0280126
8.18	0.0359131
8.2	0.0434448
8.22	0.00663421
8.24	0.00738329
8.26	0.0215517
8.28	0.0217832
8.3	0.0419643
8.32	0.0431298
8.34	0.0651767
8.36	-0.0302819
8.38	-0.0424336
8.4	-0.0225965
8.42	-0.0179421
8.44	0.00196393
8.46	0.0213075
8.48	-0.0346437
8.5	-0.0482139
8.52	-0.0347697
8.54	-0.0377338
8.56	-0.0248337
8.58	-0.018344
8.6	-0.00724815
8.62	-0.00442292
8.64	-0.0219987
8.66	-0.010784
8.68	-0.0111633
8.7	-0.00387009
8.72	0.000221785
8.74	0.00924745
8.76	0.0153644
8.78	0.0191829
8.8	0.00681754
8.82	-0.00138216
8.84	-0.00819
8.86	0.00212464
8.88	0.00647356
8.9	0.01791
8.92	0.0262445
8.94	0.0384237
8.96	0.0472091
8.98	0.0554935
9	0.0132363
9.02	0.000601083
9.04	0.0080325
9.06	0.00908996
9.08	-0.00205393
9.1	-0.0050463
9.12	0.00431361
9.14	0.00630315
9.16	0.0157629
9.18	0.0204205
9.2	0.0304876
9.22	0.0359478
9.24	0.0462451
9.26	0.0520601
9.28	0.0622566
9.3	0.0593586
9.32	0.0635134
9.34	0.0565677
9.36	0.0399294
9.38	-0.0390821
9.4	-0.0176658
9.42	-0.0126224
9.44	-0.0102343
9.46	-0.0362124
9.48	-0.0536224
9.5	-0.0794714
9.52	-0.0653184
9.54	-0.0592452
9.56	-0.0425533
9.58	-0.0311144
9.6	-0.0106618
9.62	0.00469917
9.64	0.0260196
9.66	0.0421533
9.68	0.0582341
9.7	-0.00210215
9.72	-0.00562811
9.74	0.00892931
9.76	0.0141782
9.78	0.0313715
9.8	0.0455868
9.82	0.0593429
9.84	0.0787657
9.86	0.05395
9.88	-0.0445284
9.9	-0.0323159
9.92	-0.0351666
9.94	-0.029353
9.96	-0.0152325
9.98	-0.0403704
10	-0.0680054
10.02	-0.0521608
10.04	-0.0545297
10.06	-0.0421596
10.08	-0.0358501
10.1	-0.0250201
10.12	-0.0165246
10.14	-0.0176529
10.16	-0.0386946
10.18	-0.039019
10.2	-0.037337
10.22	-0.0369558
10.24	-0.0231557
10.26	-0.0176945
10.28	0.00195429
10.3	-0.0259812
10.32	-0.0526145
10.34	-0.0277392
10.36	-0.0309762
10.38	-0.0128507
10.4	-0.00480533
10.42	0.010138
10.44	0.0207547
10.46	0.0280479
10.48	0.0151071
10.5	0.00626472
10.52	-0.000925722
10.54	0.0092925
10.56	0.0142522
10.58	0.0251455
10.6	0.0331632
10.62	0.0433786
10.64	0.0515876
10.66	0.0597461
10.68	0.0411453
10.7	0.0205103
10.72	0.00653782
10.74	0.0100381
10.76	0.0119763
10.78	0.0158946
10.8	0.00755024
10.82	-0.00273858
10.84	-0.00539689
10.86	-0.00366439
10.88	-0.00735115
10.9	-0.00799407
10.92	-0.00502709
10.94	-0.00223392
10.96	0.00475083
10.98	0.0121725
11	0.0186461
11.02	0.0081963
11.04	-0.00127607
11.06	-0.0137507
11.08	-0.00422352
11.1	0.00306964
11.12	0.0074507
11.14	-0.00412398
11.16	-0.00154287
11.18	0.00260357
11.2	0.00682385
11.22	0.0122529
11.24	0.0164732
11.26	0.00509134
11.28	-0.000938574
11.3	-0.00351319
11.32	0.000257144
11.34	0.00250393
11.36	0.00122787
11.38	-0.00298286
11.4	-0.00104463
11.42	-0.000437157
11.44	0.00134036
11.46	0.00281572
11.48	-0.00167142
11.5	-0.00967806
11.52	-0.0133973
11.54	-0.00774333
11.56	-0.0074444
11.58	-0.00558306
11.6	-0.00399546
11.62	-0.000462861
11.64	0.00668241
11.66	-0.0033494
11.68	-0.00276107
11.7	-0.000964278
11.72	-0.00323347
11.74	-0.00342972
11.76	-0.00300214
11.78	8.03565e-05
11.8	0.00253285
11.82	0.00770459
11.84	0.0116068
11.86	0.0228214
11.88	0.0252419
11.9	0.00608139
11.92	-0.00824449
11.94	-0.00381213
11.96	-0.00113463
11.98	0.00529074
12	0.00176463
12.02	-0.00685282
12.04	-0.0147826
12.06	-0.0135642
12.08	-0.00670509
12.1	-0.00117964
12.12	0.005355
12.14	0.0104945
12.16	0.0137186
12.18	0.00416902
12.2	-0.00488565
12.22	-0.00633528
12.24	-0.00237214
12.26	-0.00639324
12.28	-0.00413343
12.3	-0.0015332
12.32	0.00198
12.34	0.00454829
12.36	0.00883292
12.38	0.00770459
12.4	0.00282857
12.42	-6.42852e-06
12.44	0.00672431
12.46	0.0142393
12.48	0.0161132
12.5	0.00640301
12.52	0.00326246
12.54	-0.000437157
12.56	-0.000363227
12.58	0.00194787
12.6	0.0033075
12.62	0.00847602
12.64	0.0121499
12.66	0.0171612
12.68	0.0177172
12.7	0.0139532
12.72	0.013127
12.74	0.0182637
12.76	0.0246374
12.78	0.0120343
12.8	0.0135548
12.82	0.00345524
12.84	-0.00620991
12.86	-0.00769167
12.88	-0.0126643
12.9	-0.01296
12.92	-0.0147826
12.94	-0.0135963
12.96	-0.0143615
12.98	-0.0015075
13	0.00608801
13.02	-0.00635796
13.04	-0.0154448
13.06	-0.0167013
13.08	-0.0112628
13.1	-0.0126803
13.12	-0.00952403
13.14	-0.00981635
13.16	-0.0081355
13.18	-0.00817394
13.2	-0.00826056
13.22	-0.0107421
13.24	-0.00954324
13.26	-0.00662477
13.28	-0.002115
13.3	0.00315
13.32	0.00942764
13.34	0.010321
13.36	0.0119057
13.38	0.0113208
13.4	0.0119057
13.42	0.00958829
13.44	0.0102054
13.46	0.00396333
13.48	0.00728343
13.5	0.00473792
13.52	0.0127512
13.54	-0.0273055
13.56	-0.0429534
13.58	-0.0427676
13.6	-0.0431109
13.62	-0.0379733
13.64	-0.0330813
13.66	-0.0262704
13.68	-0.0205103
13.7	-0.0138953
13.72	-0.00787815
13.74	-0.00155251
13.76	-0.00250715
13.78	-0.0054706
13.8	-0.004307
13.82	0.00311144
13.84	0.00565709
13.86	0.00198642
13.88	0.00890347
13.9	0.0190865
13.92	0.0282889
13.94	0.0389497
13.96	0.0549045
13.98	0.0360927
14	-0.0349366
14.02	-0.0113819
14.04	-0.0138824
14.06	-0.00720657
14.08	-0.0304359
14.1	-0.0207065
14.12	-0.0187715
14.14	-0.0211563
14.16	-0.017325
14.18	-0.000488565
14.2	0.0125679
14.22	0.0348359
14.24	0.0540634
14.26	0.0308155
14.28	0.0135289
14.3	0.0218153
14.32	0.00465759
14.34	-0.0026775
14.36	-0.0163028
14.38	-0.0262093
14.4	-0.0366156
14.42	-0.0365935
14.44	-0.0254025
14.46	-0.0114912
14.48	0.00134036
14.5	0.0178844
14.52	0.0382694
14.54	0.0521136
14.56	-0.00827694
14.58	0.00145606
14.6	-0.00140143
14.62	0.00100287
14.64	0.0050882
14.66	0.0176176
14.68	0.026042
14.7	-0.00623574
14.72	-0.0185752
14.74	-0.0050819
14.76	-0.00523939
14.78	-0.000552857
14.8	0.00276107
14.82	0.0126224
14.84	0.0186042
14.86	0.0245442
14.88	0.0261226
14.9	0.0193627
14.92	0.0101443
14.94	0.00107037
14.96	0.00242358
14.98	-0.0127222
15	-0.0141331
15.02	-0.00221785
15.04	0.00576009
15.06	0.0185431
15.08	0.00334278
15.1	-0.00145606
15.12	0.00176463
15.14	-0.00364486
15.16	-0.00872046
15.18	-0.0137444
15.2	-0.0109768
15.22	-0.00789736
15.24	-0.00323347
15.26	0.0068818
15.28	0.01701
15.3	0.0277361
15.32	0.0370944
15.34	0.0238405
15.36	0.00793611
15.38	-0.011552
15.4	-0.00839885
15.42	-0.00670509
15.44	-0.0277553
15.46	-0.0310114
15.48	-0.0186332
15.5	-0.0105427
15.52	0.0027675
15.54	0.00857556
15.56	0.0166147
15.58	0.0118478
15.6	0.00288323
15.62	-0.00156215
15.64	-0.00644459
15.66	-0.00995778
15.68	-0.00738329
15.7	-0.0118638
15.72	-0.0174214
15.74	-0.0229919
15.76	-0.02556
15.78	-0.0166018
15.8	-0.0106842
15.82	-0.000151071
15.84	0.00232716
15.86	-0.000996439
15.88	6.75014e-05
15.9	-0.00521356
15.92	-0.0129569
15.94	-0.00239142
15.96	0.00275143
15.98	0.0121918
16	0.0199735
16.02	0.0215391
16.04	0.00836356
16.06	-0.00167785
16.08	-0.015046
16.1	-0.011295
16.12	-0.00762741
16.14	-0.00140465
16.16	0.00422352
16.18	0.012314
16.2	0.00791028
16.22	-0.00717444
16.24	-0.0135995
16.26	-0.0217126
16.28	-0.0210987
16.3	-0.0188581
16.32	-0.0163479
16.34	-0.013018
16.36	-0.00980028
16.38	-0.00845995
16.4	-0.017267
16.42	-0.0201055
16.44	-0.0290701
16.46	-0.0355099
16.48	-0.0282117
16.5	-0.0246891
16.52	-0.0186108
16.54	-0.015149
16.56	-0.0106168
16.58	-0.00635135
16.6	0.000723208
16.62	0.00681754
16.64	0.0139564
16.66	0.0197294
16.68	0.0247146
16.7	0.0300085
16.72	0.0343161
16.74	0.0363321
16.76	0.0382
16.78	0.0400806
16.8	0.0429124
16.82	0.0512253
16.84	0.0577867
16.86	0.0654601
16.88	0.0397436
16.9	0.0141813
16.92	-0.00449348
16.94	-0.0214424
16.96	-0.0178394
16.98	-0.02232
17	-0.0316386
17.02	-0.0401058
17.04	-0.0379166
17.06	-0.0338121
17.08	-0.0296002
17.1	-0.0239529
17.12	-0.026042
17.14	-0.0274018
17.16	-0.0276879
17.18	-0.0278293
17.2	-0.0281153
17.22	-0.0279997
17.24	-0.0285106
17.26	-0.0173669
17.28	0.00159749
17.3	0.00679486
17.32	0.00779468
17.34	0.0185176
17.36	0.0100028
17.38	0.0074507
17.4	0.0154895
17.42	0.0187907
17.44	0.0167656
17.46	0.0112597
17.48	0.00621652
17.5	0.00623574
17.52	0.0156889
17.54	0.0108577
17.56	0.00912209
17.58	0.0137088
17.6	0.00754078
17.62	0.00264216
17.64	0.00232394
17.66	-0.00494991
17.68	-0.00263249
17.7	-0.000813204
17.72	0.00224356
17.74	0.00120535
17.76	-0.0048343
17.78	-0.0103758
17.8	-0.00792949
17.82	-0.00112499
17.84	0.00566023
17.86	0.0134581
17.88	0.0139113
17.9	0.0162162
17.92	0.0147729
17.94	0.015149
17.96	0.0059913
17.98	0.00687866
18	0.00858533
18.02	0.0123685
18.04	0.0159718
18.06	0.0182763
18.08	0.0186653
18.1	0.0261418
18.12	0.0253736
18.14	0.0302176
18.16	0.0108385
18.18	0.00115394
18.2	-0.00421061
18.22	-0.0114525
18.24	-0.0139564
18.26	-0.0136767
18.28	-0.00910917
18.3	-0.00899041
18.32	0.00210215
18.34	0.0134388
18.36	-0.00770774
18.38	-0.0127638
18.4	-0.00295716
18.42	0.00413689
18.44	0.0140077
18.46	0.000530366
18.48	-0.0227058
18.5	-0.0259295
18.52	-0.00837333
18.54	-0.00468657
18.56	0.00222749
18.58	-0.00404996
18.6	-0.00838593
18.62	-0.0110634
18.64	-0.00896774
18.66	-0.0100381
18.68	-0.00675643
18.7	-0.00252321
18.72	-0.00155251
18.74	0.00300214
18.76	0.00917689
18.78	0.0106779
18.8	0.0304199
18.82	0.0284817
18.84	0.00540635
18.86	-0.0120213
18.88	-0.0323001
18.9	-0.0263315
18.92	-0.0242679
18.94	-0.0177203
18.96	-0.0109639
18.98	-0.004513
19	0.000636426
19.02	0.0043555
19.04	0.015962
19.06	-0.00111214
19.08	-0.0160874
19.1	-0.0119155
19.12	-0.0225836
19.14	-0.0169971
19.16	-0.0122979
19.18	0.00241394
19.2	0.0199382
19.22	0.0266143
19.24	0.040635
19.26	0.0441976
19.28	0.0379638
19.3	0.0237182
19.32	0.00684968
19.34	-0.003253
19.36	-0.00768222
19.38	0.00195429
19.4	0.00543218
19.42	0.0170582
19.44	0.0124362
19.46	0.00101893
19.48	-0.00302463
19.5	-0.00637717
19.52	-0.001035
19.54	-0.000237857
19.56	-0.00415296
19.58	-0.00718074
19.6	-0.0101313
19.62	-0.0168878
19.64	-0.0237601
19.66	-0.0190414
19.68	-0.00894222
19.7	-0.00615226
19.72	0.000893561
19.74	0.0027193
19.76	0.00401153
19.78	0.00667296
19.8	0.0136543
19.82	0.0024943
19.84	-0.0180063
19.86	-0.01827
19.88	-0.00820291
19.9	-0.0030343
19.92	0.00764347
19.94	0.0127512
19.96	0.00546116
19.98	-0.00129534
20	-0.00819976
20.02	-0.000909657
20.04	0.0075537
20.06	0.0150687
20.08	0.024782
20.1	0.0195684
20.12	0.0102567
20.14	-0.000871069
20.16	-0.00665028
20.18	-0.00835726
20.2	-0.00719366
20.22	-0.00395357
20.24	0.00123108
20.26	0.00733194
20.28	-0.00146573
20.3	-0.00735431
20.32	-0.015509
20.34	-0.0120762
20.36	-0.00663421
20.38	-0.000983556
20.4	0.00510111
20.42	-0.00297322
20.44	-0.000199285
20.46	0.00699426
20.48	0.0116648
20.5	0.0189224
20.52	0.0162323
20.54	0.0134968
20.56	0.0107069
20.58	0.0158464
20.6	0.0206454
20.62	0.0215712
20.64	0.00518774
20.66	-0.00584357
20.68	-0.0172768
20.7	-0.0217158
20.72	-0.0127704
20.74	-0.0075055
20.76	-0.00138858
20.78	0.00346185
20.8	-0.00443583
20.82	-0.0116421
20.84	-0.0168396
20.86	-0.0111214
20.88	-0.00731902
20.9	-0.000732847
20.92	0.0042588
20.94	0.00190606
20.96	-0.00232716
20.98	-0.00419454
21	-0.0106457
21.02	-0.0114525
21.04	-0.00321426
21.06	0.0020218
21.08	0.00964939
21.1	0.0148532
21.12	0.0191057
21.14	0.0182026
21.16	0.010337
21.18	-0.0026518
21.2	-0.0252384
21.22	-0.0198419
21.24	-0.0143357
21.26	-0.00701033
21.28	0.0007457
21.3	0.0109639
21.32	0.00917343
21.34	0.00360959
21.36	0.0106265
21.38	0.0099162
21.4	0.00793296
21.42	0.00635449
21.44	0.00613935
21.46	0.00533263
21.48	0.000459648
21.5	-0.00487935
21.52	-0.0112338
21.54	-0.0111406
21.56	-0.00486329
21.58	-0.00113784
21.6	0.00526806
21.62	-0.0033138
21.64	-0.00838278
21.66	-0.0091895
21.68	-0.0126513
21.7	-0.00799407
21.72	-0.0070812
21.74	-0.00605556
21.76	-0.00575694
21.78	-0.00142071
21.8	-0.00102536
21.82	-0.0061362
21.84	-0.0041013
21.86	0.00261321
21.88	0.0108836
21.9	0.0221656
21.92	0.0291183
21.94	0.0272507
21.96	0.0243032
21.98	0.0163318
22	0.00586278
22.02	0.000331065
22.04	-0.00621652
22.06	-0.00499495
22.08	-0.00244607
22.1	0.000540005
22.12	0.00405657
22.14	0.00678542
22.16	0.000687865
22.18	-0.00410476
22.2	-0.0106489
22.22	-0.0167914
22.24	-0.0228246
22.26	-0.0187135
22.28	-0.014908
22.3	-0.00996093
22.32	-0.00471209
22.34	-0.000372866
22.36	-0.0058275
22.38	-0.0102986
22.4	-0.0149786
22.42	-0.0126353
22.44	-0.0111151
22.46	-0.0102183
22.48	-0.0139983
22.5	-0.0158335
22.52	-0.0152775
22.54	-0.0135418
22.56	-0.0116037
22.58	-0.00893907
22.6	-0.00828324
22.62	-0.00449348
22.64	-0.00216966
22.66	0.016277
22.68	0.0232328
22.7	0.0282117
22.72	0.0251679
22.74	0.0245861
22.76	0.0141526
22.78	0.00257787
22.8	0.000466074
22.82	-0.00403704
22.84	-0.000424274
22.86	0.000986801
22.88	0.00340704
22.9	0.00337176
22.92	0.00627763
22.94	0.00662791
22.96	0.00245892
22.98	-0.00175499
23	-0.00222428
23.02	0.00230463
23.04	0.00350343
23.06	0.00478611
23.08	-0.00018643
23.1	-0.00504
23.12	-0.00589806
23.14	-0.000147858
23.16	0.00510111
23.18	0.0034587
23.2	-0.00357115
23.22	-0.00961726
23.24	-0.00979713
23.26	-0.00295394
23.28	-0.00172286
23.3	0.000234643
23.32	0.000790713
23.34	0.00171965
23.36	0.00198642
23.38	0.00323694
23.4	0.00447111
23.42	0.00581774
23.44	0.00717759
23.46	0.00852421
23.48	0.00988407
23.5	0.0112628
23.52	0.0125902
23.54	0.0153837
23.56	0.0128218
23.58	0.00780444
23.6	0.00389245
23.62	-0.00237857
23.64	-0.00378315
23.66	0.00190285
23.68	0.0010768
23.7	-0.00786208
23.72	-0.0179774
23.74	-0.0200699
23.76	-0.0187746
23.78	-0.0130917
23.8	-0.00196072
23.82	0.00893246
23.84	0.009135
23.86	-0.000478926
23.88	-0.0016907
23.9	-0.00333333
23.92	-0.00685944
23.94	-0.0131657
23.96	-0.0164345
23.98	-0.0069237
24	0.0012182
24.02	0.00275464
24.04	0.004725
24.06	0.00571819
24.08	0.00839569
24.1	0.010607
24.12	0.0128347
24.14	0.00550273
24.16	-0.00409815
24.18	-0.0101474
24.2	-0.00907704
24.22	-0.0089838
24.24	-0.0094919
24.26	-0.010652
24.28	-0.00758898
24.3	-0.00219536
24.32	0.004307
24.34	0.0123363
24.36	0.0132139
24.38	0.00813204
24.4	0.00530995
24.42	-0.00102536
24.44	-0.00461884
24.46	-0.0090257
24.48	-0.00985509
24.5	-0.0033012
24.52	0.00332671
24.54	0.0110379
24.56	0.0188228
24.58	0.0139019
24.6	0.00490833
24.62	4.82139e-05
24.64	-0.00402444
24.66	-0.00840199
24.68	-0.0106426
24.7	-0.0111954
24.72	-0.0124104
24.74	-0.0126384
24.76	-0.0153644
24.78	-0.0151458
24.8	-0.0127254
24.82	-0.0127959
24.84	-0.0109576
24.86	-0.0057245
24.88	-0.00150428
24.9	0.00170358
24.92	-0.000282857
24.94	-0.00202501
24.96	-0.00510111
24.98	-0.00340389
25	0.00438102
25.02	0.0117996
25.04	0.0213526
25.06	0.0233069
25.08	0.0248239
25.1	0.0240462
25.12	0.02052
25.14	0.015853
25.16	0.00882
25.18	-0.00111856
25.2	-0.00892301
25.22	-0.0120472
25.24	-0.01548
25.26	-0.0134615
25.28	-0.0130372
25.3	-0.00857556
25.32	-0.00133714
25.34	0.00791343
25.36	0.0140273
25.38	0.0197099
25.4	0.014863
25.42	0.00942102
25.44	0.00438102
25.46	-0.0014432
25.48	-0.00850815
25.5	-0.013304
25.52	-0.00529389
25.54	0.000324639
25.56	0.00849524
25.58	0.01575
25.6	0.0209314
25.62	0.0180964
25.64	0.013603
25.66	0.00620046
25.68	-0.0012182
25.7	-0.00945315
25.72	-0.0167432
25.74	-0.0224743
25.76	-0.029507
25.78	-0.0274563
25.8	-0.0199606
25.82	-0.0118062
25.84	0.00311466
25.86	0.0102085
25.88	0.0192471
25.9	0.0200123
25.92	0.0126869
25.94	0.0115555
25.96	0.0103081
25.98	0.00817709
26	0.000919296
26.02	-0.00609745
26.04	-0.0047732
26.06	-0.000218572
26.08	0.00348421
26.1	0.0094563
26.12	0.0134133
26.14	0.0183569
26.16	0.0173634
26.18	0.01035
26.2	0.00559597
26.22	-0.000517513
26.24	-0.00578561
26.26	-0.0086206
26.28	-0.0116389
26.3	-0.01422
26.32	-0.0168815
26.34	-0.0152838
26.36	-0.0119026
26.38	-0.00927643
26.4	-0.00602343
26.42	-0.00567976
26.44	-0.00484061
26.46	-0.00359352
26.48	-0.00143678
26.5	0.000289287
26.52	0.00215999
26.54	-0.000517513
26.56	-0.00333963
26.58	-0.00637056
26.6	-0.0100961
26.62	-0.0122592
26.64	-0.01071
26.66	-0.00901593
26.68	-0.0102986
26.7	-0.0128766
26.72	-0.0154126
26.74	-0.017897
26.76	-0.0204621
26.78	-0.0176431
26.8	-0.0141044
26.82	-6.75014e-05
26.84	0.00836041
26.86	0.0133973
26.88	0.0209217
26.9	0.0187907
26.92	0.0154542
26.94	0.0125197
26.96	0.0125871
26.98	0.011099
27	0.011684
27.02	0.000424274
27.04	-0.00796194
27.06	-0.0146251
27.08	-0.0149433
27.1	-0.00697819
27.12	-0.00189643
27.14	0.00542241
27.16	0.011597
27.18	0.0163447
27.2	0.0121083
27.22	0.0091413
27.24	0.00525546
27.26	0.00145284
27.28	-0.000697505
27.3	0.000803565
27.32	0.00158143
27.34	0.0033075
27.36	0.00450009
27.38	0.00314036
27.4	0.00201858
27.42	0.00081963
27.44	-0.000845365
27.46	-0.000887134
27.48	0.000273215
27.5	-0.000700717
27.52	-0.00384741
27.54	-0.007457
27.56	-0.012915
27.58	-0.0169426
27.6	-0.0224034
27.62	-0.0102955
27.64	-0.0015493
27.66	0.00310177
27.68	0.0106618
27.7	0.0154413
27.72	0.0164732
27.74	0.0115778
27.76	0.011099
27.78	0.00990013
27.8	0.00926352
27.82	0.00851477
27.84	0.00549644
27.86	-0.00010607
27.88	-0.00672431
27.9	-0.011684
27.92	-0.00988061
27.94	-0.00950134
27.96	-0.00891954
27.98	-0.00757921
28	-0.00847602
28.02	-0.00986801
28.04	-0.0116969
28.06	-0.0114462
28.08	-0.00983556
28.1	-0.00618093
28.12	0.000668556
28.14	0.00631607
28.16	0.0051975
28.18	0.00415926
28.2	0.00454829
28.22	0.00354217
28.24	0.00351319
28.26	0.00296037
28.28	0.00289929
28.3	0.000607509
28.32	-0.00417848
28.34	-0.00794903
28.36	-0.0139854
28.38	-0.0138984
28.4	-0.00962042
28.42	-0.0061907
28.44	-0.00152356
28.46	0.00309535
28.48	0.00541296
28.5	0.00472815
28.52	0.00557046
28.54	0.00247499
28.56	-0.00186108
28.58	-0.00694921
28.6	-0.00752157
28.62	0.00188679
28.64	0.00841491
28.66	0.00860139
28.68	0.00269035
28.7	-0.00136927
28.72	-0.00730926
28.74	-0.00249751
28.76	0.00097713
28.78	0.00578907
28.8	0.00994172
28.82	0.015332
28.84	0.0147247
28.86	0.00526806
28.88	-0.00189643
28.9	-0.0128025
28.92	-0.0143067
28.94	-0.00782366
28.96	-0.00328514
28.98	0.00689472
29	0.00834435
29.02	0.00380583
29.04	0.00020893
29.06	-0.00548667
29.08	-0.01233
29.1	-0.0182861
29.12	-0.0251581
29.14	-0.0199927
29.16	-0.00828639
29.18	0.00131465
29.2	0.0145962
29.22	0.0250649
29.24	0.0353903
29.26	0.030526
29.28	0.0156505
29.3	0.00381213
29.32	-0.0125099
29.34	-0.0273055
29.36	-0.0394821
29.38	-0.0278873
29.4	-0.0198771
29.42	-0.00744755
29.44	0.00474107
29.46	0.0152101
29.48	0.0102986
29.5	0.00784602
29.52	0.0029668
29.54	0.00716783
29.56	0.0107743
29.58	0.0161034
29.6	0.0189995
29.62	0.0165504
29.64	0.0176463
29.66	0.0189901
29.68	0.0197357
29.7	0.0189224
29.72	0.014879
29.74	0.00494046
29.76	-0.00257787
29.78	-0.00753417
29.8	-0.00984217
29.82	-0.0107198
29.84	-0.0118062
29.86	-0.0158946
29.88	-0.0213236
29.9	-0.0233872
29.92	-0.0253093
29.94	-0.0273439
29.96	-0.0183053
29.98	-0.00686889
30	0.00400176
30.02	0.0120922
30.04	0.0155701
30.06	0.0115136
30.08	0.00792004
30.1	0.00492093
30.12	0.011999
30.14	0.0189353
30.16	0.020131
30.18	0.0117353
30.2	0.00685598
30.22	0.00112499
30.24	0.000617148
30.26	-0.00215356
30.28	-0.00931487
30.3	-0.0123751
30.32	-0.0148113
30.34	-0.0163961
30.36	-0.0251005
30.38	-0.0203496
30.4	-0.00620046
30.42	0.00591098
30.44	0.0162354
30.46	0.0237504
30.48	0.0239498
30.5	0.0179005
30.52	0.0144998
30.54	0.0167079
30.56	0.0202822
30.58	0.0233292
30.6	0.0272251
30.62	0.0296292
30.64	0.0312108
30.66	0.0296935
30.68	0.0260357
30.7	0.00831852
30.72	-0.00941787
30.74	-0.0291277
30.76	-0.0439708
30.78	-0.027778
30.8	-0.0151713
30.82	0.00243643
30.84	0.0189643
30.86	0.0262864
30.88	0.017743
30.9	0.00950796
30.92	-0.000482139
30.94	-0.0123814
30.96	-0.011282
30.98	-0.000809991
31	0.00566023
31.02	0.0201824
31.04	0.0324356
31.06	0.0359006
31.08	0.0354564
31.1	0.0300504
31.12	0.0257497
31.14	0.0193788
31.16	0.0162033
31.18	0.0064575
31.2	-0.00658287
31.22	-0.0185466
31.24	-0.0329395
31.26	-0.0429754
31.28	-0.0394979
31.3	-0.038956
31.32	-0.0324576
31.34	-0.0246535
31.36	-0.0177332
31.38	-0.0158754
31.4	-0.0131368
31.42	-0.00951111
31.44	-0.00577615
31.46	-0.00468972
31.48	-0.0032656
31.5	-0.00176142
31.52	0.000494991
31.54	0.00241715
31.56	0.00100929
31.58	-0.00108322
31.6	-0.0020732
31.62	-0.00124394
31.64	-0.000530366
31.66	0.00229178
31.68	0.00647986
31.7	0.0103629
31.72	0.0143549
31.74	0.0183985
31.76	0.0179581
31.78	0.0147697
31.8	0.00953694
31.82	0.00329459
31.84	-0.000231427
31.86	-0.00120213
31.88	-0.0023207
31.9	-0.00338783
31.92	-0.00656366
31.94	-0.00618093
31.96	0.000703931
31.98	0.00416902
32	0.0077112
32.02	0.00841491
32.04	0.00842152
32.06	0.00484722
32.08	-0.000703931
32.1	-0.00318528
32.12	-0.00703615
32.14	-0.00549958
32.16	-0.00394727
32.18	-0.00218572
32.2	-0.00423643
32.22	-0.00536792
32.24	-0.00629023
32.26	-0.00790398
32.28	-0.00767245
32.3	-0.00575033
32.32	-0.00406917
32.34	-0.00606848
32.36	-0.00860139
32.38	-0.0105012
32.4	-0.0108804
32.42	-0.0147118
32.44	-0.0139019
32.46	-0.0108514
32.48	-0.0069237
32.5	-0.00233358
32.52	0.000890348
32.54	-1.60713e-05
32.56	-0.00306322
32.58	-0.00297322
32.6	-0.00489226
32.62	-0.00538083
32.64	-0.00772065
32.66	-0.0104914
32.68	-0.0135995
32.7	-0.0147952
32.72	-0.0128281
32.74	-0.0113208
32.76	-0.00835726
32.78	-0.00563157
32.8	-0.000703931
32.82	0.00491463
32.84	0.00906759
32.86	0.0115359
32.88	0.0113208
32.9	0.00855005
32.92	0.00318843
32.94	-0.00154287
32.96	-0.00407263
32.98	-0.00796824
33	-0.00741541
33.02	-0.00414005
33.04	-0.00223713
33.06	0.000488565
33.08	0.00293785
33.1	0.0063419
33.12	0.00914477
33.14	0.0116452
33.16	0.00994833
33.18	0.00573426
33.2	0.000726422
33.22	-0.00509796
33.24	-0.0102955
33.26	-0.00711963
33.28	-0.00383449
33.3	0.000401783
33.32	0.00487935
33.34	0.00950134
33.36	0.007772
33.38	0.00429439
33.4	0.00324324
33.42	0.000697505
33.44	-0.000356801
33.46	-0.000813204
33.48	-0.00118928
33.5	-0.00161356
33.52	-0.00289287
33.54	-0.00505291
33.56	-0.00478926
33.58	-0.00251036
33.6	-2.89287e-05
33.62	-0.000710356
33.64	-0.00478611
33.66	-0.00729949
33.68	-0.0120472
33.7	-0.0117964
33.72	-0.00809361
33.74	-0.00533579
33.76	-0.0004725
33.78	0.00485667
33.8	0.00968468
33.82	0.012571
33.84	0.0130275
33.86	0.0123171
33.88	0.0105556
33.9	0.00582435
33.92	0.00399861
33.94	0.00219215
33.96	-4.82139e-05
33.98	-0.00224034
34	-0.00419454
34.02	-0.00416902
34.04	-0.00371259
34.06	-0.00333333
34.08	-0.00271284
34.1	-0.00458356
34.12	-0.00660208
34.14	-0.00869778
34.16	-0.0112628
34.18	-0.0115907
34.2	-0.00955616
34.22	-0.00734454
34.24	0.000568921
34.26	0.00313394
34.28	0.00651546
34.3	0.00818023
34.32	0.00639009
34.34	0.00509796
34.36	0.00343287
34.38	0.00496944
34.4	0.00635796
34.42	0.00773357
34.44	0.00452561
34.46	0.00172286
34.48	-0.00212464
34.5	-0.00315977
34.52	-0.000838939
34.54	0.0004725
34.56	0.00321111
34.58	0.00297965
34.6	0.00125036
34.62	-4.17847e-05
34.64	-0.00212464
34.66	-0.00322056
34.68	-0.00350343
34.7	-0.00373495
34.72	-0.00421061
34.74	-0.00543847
34.76	-0.00639639
34.78	-0.00338152
34.8	-0.000321426
34.82	0.00172929
34.84	0.00414635
34.86	0.00639009
34.88	0.00639954
34.9	0.00539689
34.92	0.00459963
34.94	0.00346815
34.96	0.00411736
34.98	0.00485037
35	0.00440685
35.02	0.00372551
35.04	0.00312108
35.06	0.00189321
35.08	-0.000896773
35.1	-0.0016425
35.12	-0.00269678
35.14	-0.00575694
35.16	-0.0103115
35.18	-0.0135321
35.2	-0.0166437
35.22	-0.0152035
35.24	-0.012658
35.26	-0.00935361
35.28	-0.00352926
35.3	0.001575
35.32	0.00424935
35.34	0.00501417
35.36	0.00569583
35.38	0.00623574
35.4	0.00820291
35.42	0.010607
35.44	0.0105493
35.46	0.00806778
35.48	0.005567
35.5	0.00141429
35.52	-0.00272573
35.54	-0.00613935
35.56	-0.00735431
35.58	-0.00980343
35.6	-0.00889718
35.62	-0.00732848
35.64	-0.00558306
35.66	-0.00392144
35.68	-0.0040405
35.7	-0.00417532
35.72	-0.0025618
35.74	-0.000864644
35.76	0.00126321
35.78	0.00206035
35.8	0.00177751
35.82	0.00157821
35.84	0.00206678
35.86	0.00402098
35.88	0.00576324
35.9	0.00778176
35.92	0.00987746
35.94	0.00954954
35.96	0.00807755
35.98	0.00691394
36	0.00524885
36.02	0.0061425
36.04	0.00753102
36.06	0.00903546
36.08	0.00968468
36.1	0.00627102
36.12	0.00341681
36.14	-0.00128249
36.16	-0.00522963
36.18	-0.0103789
36.2	-0.0107582
36.22	-0.00706829
36.24	-0.00474736
36.26	-0.000350343
36.28	0.000363227
36.3	-0.0017325
36.32	-0.00323694
36.34	-0.00407894
36.36	-0.00458671
36.38	-0.00417532
36.4	-0.00333333
36.42	-0.00231106
36.44	-0.000568921
36.46	0.00103178
36.48	0.00274179
36.5	0.00504977
36.52	0.00769513
36.54	0.0102246
36.56	0.0109737
36.58	0.0101956
36.6	0.00685944
36.62	0.0023207
36.64	0.000302142
36.66	-0.000507843
36.68	-0.00149786
36.7	-0.00243643
36.72	-0.00387639
36.74	-0.00504
36.76	-0.00371574
36.78	-0.00182571
36.8	-0.00018
36.82	-0.000122144
36.84	-8.35726e-05
36.86	0.000424274
36.88	0.00149143
36.9	0.00228857
36.92	0.00277713
36.94	0.0031243
36.96	0.00399861
36.98	0.00469917
37	0.00554463
37.02	0.00640616
37.04	0.00824449
37.06	0.0101669
37.08	0.00924115
37.1	0.0074025
37.12	0.00339098
37.14	-5.46431e-05
37.16	-0.000337491
37.18	-0.00117964
37.2	-0.00168749
37.22	-0.00269035
37.24	-0.00165536
37.26	-0.000247499
37.28	0.00120535
37.3	0.00306322
37.32	0.00500157
37.34	0.00656996
37.36	0.00461569
37.38	0.00232716
37.4	0.000694292
37.42	-0.000726422
37.44	-0.0022307
37.46	-0.00323347
37.48	-0.00239142
37.5	-0.00175499
37.52	-0.00091287
37.54	-0.000498204
37.56	2.25001e-05
37.58	-4.82139e-05
37.6	-0.000170358
37.62	-0.000369652
37.64	-0.000298929
37.66	-0.000112499
37.68	5.46431e-05
37.7	0.000498204
37.72	0.00172929
37.74	0.00275143
37.76	0.00407579
37.78	0.00493699
37.8	0.00423643
37.82	0.0032656
37.84	0.00182571
37.86	0.00018
37.88	-0.00125679
37.9	-0.00315977
37.92	-0.00305679
37.94	-0.00148822
37.96	-0.000196072
37.98	0.000986801
38	0.00147537
38.02	0.00217608
38.04	0.00170358
38.06	0.00143999
38.08	0.000610722
38.1	-7.07143e-05
38.12	-0.000899987
38.14	-0.000906444
38.16	-0.000514301
38.18	-0.000196072
38.2	-0.000125357
38.22	-0.000549644
38.24	-0.000671801
38.26	-0.00116037
38.28	-0.000993227
38.3	-0.000225001
38.32	0.000488565
38.34	0.00131787
38.36	0.00212786
38.38	0.00202501
38.4	0.00171001
38.42	0.000196072
38.44	-0.00140465
38.46	-0.00243964
38.48	-0.00201537
38.5	-0.00208606
38.52	-0.00339759
38.54	-0.00516852
38.56	-0.00554778
38.58	-0.00375417
38.6	-0.002205
38.62	-0.00115073
38.64	-0.00075537
38.66	-5.46431e-05
38.68	0.000176784
38.7	0.00116679
38.72	0.00268393
38.74	0.00370597
38.76	0.00230142
38.78	0.0012343
38.8	-0.000269999
38.82	-0.000790713
38.84	-0.00104142
38.86	-0.0013018
38.88	-0.0013918
38.9	-0.0020732
38.92	-0.00380237
38.94	-0.00374472
38.96	-0.00341365
38.98	-0.00313072
39	-0.0025457
39.02	-0.00242358
39.04	-0.00347792
39.06	-0.00441315
39.08	-0.00527467
39.1	-0.00460593
39.12	-0.00411736
39.14	-0.00354532
39.16	-0.00340704
39.18	-0.0031243
39.2	-0.00308571
39.22	-0.00199927
39.24	0
39.26	0.00176463
39.28	0.00360328
39.3	0.00491463
39.32	0.00639954
39.34	0.00549328
39.36	0.00457065
39.38	0.00334278
39.4	0.00212786
39.42	0.000353556
39.44	-0.00207963
39.46	-0.00333963
39.48	-0.00384741
39.5	-0.00440024
39.52	-0.00526176
39.54	-0.0068755
39.56	-0.00856926
39.58	-0.00876866
39.6	-0.00689787
39.62	-0.00568292
39.64	-0.00364833
39.66	-0.00191892
39.68	8.03565e-05
39.7	0.00177751
39.72	0.00326246
39.74	0.00467051
39.76	0.0060943
39.78	0.00750204
39.8	0.008505
39.82	0.00824134
39.84	0.00738329
39.86	0.00554463
39.88	0.00416902
39.9	0.00178394
39.92	-0.00142393
39.94	-0.00474107
39.96	-0.00666004
39.98	-0.00811283
40	-0.00801013
[truncated: 1,174 more rows]

## Sheet: 500 year 
0.02	2.80406e-05
0.04	0.000140203
0.06	2.80406e-05
0.08	0.000140203
0.1	1.86937e-05
0.12	0.00013086
0.14	1.86937e-05
0.16	0.00013086
0.18	1.86937e-05
0.2	0.00013086
0.22	1.86937e-05
0.24	0.000121507
0.26	9.34686e-06
0.28	0.000121507
0.3	9.34686e-06
0.32	0.000121507
0.34	9.34686e-06
0.36	0.000121507
0.38	0
0.4	0.000112164
0.42	0
0.44	0.000112164
0.46	0
0.48	0.000112164
0.5	-9.34686e-06
0.52	0.000102812
0.54	-9.34686e-06
0.56	0.000102812
0.58	-1.86937e-05
0.6	9.34686e-05
0.62	-1.86937e-05
0.64	9.34686e-05
0.66	-1.86937e-05
0.68	9.34686e-05
0.7	-2.80406e-05
0.72	8.41227e-05
0.74	-2.80406e-05
0.76	8.41227e-05
0.78	-3.73875e-05
0.8	7.47758e-05
0.82	-3.73875e-05
0.84	7.47758e-05
0.86	-3.73875e-05
0.88	6.5429e-05
0.9	-4.67343e-05
0.92	6.5429e-05
0.94	-4.67343e-05
0.96	6.5429e-05
0.98	-5.60812e-05
1	5.60812e-05
1.02	-5.60812e-05
1.04	5.60812e-05
1.06	-6.5429e-05
1.08	4.67343e-05
1.1	-6.5429e-05
1.12	4.67343e-05
1.14	-7.47758e-05
1.16	3.73875e-05
1.18	-7.47758e-05
1.2	2.80406e-05
1.22	-8.41227e-05
1.24	2.80406e-05
1.26	-8.41227e-05
1.28	1.86937e-05
1.3	-9.34686e-05
1.32	1.86937e-05
1.34	-0.000102812
1.36	9.34686e-06
1.38	-0.000102812
1.4	9.34686e-06
1.42	-0.000112164
1.44	0
1.46	-0.000112164
1.48	-9.34686e-06
1.5	-0.000121507
1.52	-9.34686e-06
1.54	-0.00013086
1.56	-1.86937e-05
1.58	-0.00013086
1.6	-2.80406e-05
1.62	-0.000140203
1.64	-2.80406e-05
1.66	-0.000149555
1.68	-3.73875e-05
1.7	-0.000149555
1.72	-3.73875e-05
1.74	-0.000158899
1.76	-4.67343e-05
1.78	-0.000168242
1.8	-5.60812e-05
1.82	-0.000168242
1.84	-6.5429e-05
1.86	-0.000177594
1.88	-6.5429e-05
1.9	-0.000186937
1.92	-7.47758e-05
1.94	-0.000186937
1.96	-8.41227e-05
1.98	-0.00019629
2	-8.41227e-05
2.02	-0.000205633
2.04	-9.34686e-05
2.06	-0.000214976
2.08	-0.000102812
2.1	-0.000214976
2.12	-0.000112164
2.14	-0.000224328
2.16	-0.000121507
2.18	-0.000233672
2.2	-0.000121507
2.22	-0.000243024
2.24	-0.00013086
2.26	-0.000252367
2.28	-0.000140203
2.3	-0.000252367
2.32	-0.000149555
2.34	-0.00026171
2.36	-0.000158899
2.38	-0.000271063
2.4	-0.000158899
2.42	-0.000280406
2.44	-0.000168242
2.46	-0.000289758
2.48	-0.000177594
2.5	-0.000299101
2.52	-0.000186937
2.54	-0.000308445
2.56	-0.00019629
2.58	-0.000308445
2.6	-0.000205633
2.62	-0.000317797
2.64	-0.000214976
2.66	-0.00032714
2.68	-0.000224328
2.7	-0.000336493
2.72	-0.000224328
2.74	-0.000345836
2.76	-0.000233672
2.78	-0.000355188
2.8	-0.000243024
2.82	-0.000364531
2.84	-0.000252367
2.86	-0.000373875
2.88	-0.00026171
2.9	-0.000383227
2.92	-0.000271063
2.94	-0.00039257
2.96	-0.000280406
2.98	-0.000401922
3	-0.000289758
3.02	-0.000411266
3.04	-0.000299101
3.06	-0.000420609
3.08	-0.000308445
3.1	-0.000420609
3.12	-0.000317797
3.14	-0.000429961
3.16	-0.00032714
3.18	-0.000439304
3.2	-0.000336493
3.22	-0.000448657
3.24	-0.000345836
3.26	-0.000458
3.28	-0.000355188
3.3	-0.000467343
3.32	-0.000364531
3.34	-0.000476696
3.36	-0.000373875
3.38	-0.000486039
3.4	-0.000383227
3.42	-0.000495391
3.44	-0.00039257
3.46	-0.000514078
3.48	-0.000401922
3.5	-0.00052343
3.52	-0.000411266
3.54	-0.000532773
3.56	-0.000420609
3.58	-0.000542125
3.6	-0.000429961
3.62	-0.000551469
3.64	-0.000439304
3.66	-0.000560812
3.68	-0.000448657
3.7	-0.000570164
3.72	-0.000458
3.74	-0.000579507
3.76	-0.000467343
3.78	-0.00058886
3.8	-0.000476696
3.82	-0.000598203
3.84	-0.000486039
3.86	-0.000607555
3.88	-0.000495391
3.9	-0.000616899
3.92	-0.000504734
3.94	-0.000626242
3.96	-0.00052343
3.98	-0.000635594
4	-0.000532773
4.02	-0.000644937
4.04	-0.000542125
4.06	-0.00065429
4.08	-0.000551469
4.1	-0.000663633
4.12	-0.000560812
4.14	-0.000672976
4.16	-0.000570164
4.18	-0.000682328
4.2	-0.000579507
4.22	-0.000701024
4.24	-0.00058886
4.26	-0.000710367
4.28	-0.000598203
4.3	-0.00071971
4.32	-0.000607555
4.34	-0.000729063
4.36	-0.000616899
4.38	-0.000738406
4.4	-0.000626242
4.42	-0.000747758
4.44	-0.000635594
4.46	-0.000757101
4.48	-0.000644937
4.5	-0.000766445
4.52	-0.00065429
4.54	-0.000775797
4.56	-0.000663633
4.58	-0.00078514
4.6	-0.000682328
4.62	-0.000794493
4.64	-0.000691672
4.66	-0.000803836
4.68	-0.000701024
4.7	-0.000813188
4.72	-0.000710367
4.74	-0.000822531
4.76	-0.00071971
4.78	-0.000831875
4.8	-0.000729063
4.82	-0.000841227
4.84	-0.000738406
4.86	-0.00085057
4.88	-0.000747758
4.9	-0.000859922
4.92	-0.000757101
4.94	-0.000869266
4.96	-0.000766445
4.98	-0.000878609
5	-0.000775797
5.02	-0.00227131
5.04	-0.0109453
5.06	-0.0104122
5.08	-0.00908525
5.1	-0.00986074
5.12	-0.0120857
5.14	-0.014263
5.16	-0.0128423
5.18	-0.0112815
5.2	-0.0088329
5.22	-0.00895436
5.24	-0.0131419
5.26	-0.017469
5.28	-0.01904
5.3	-0.0161701
5.32	-0.0143757
5.34	-0.0111321
5.36	-0.00858988
5.38	-0.0049726
5.4	-0.00710367
5.42	-0.0132912
5.44	-0.0187029
5.46	-0.0193761
5.48	-0.00712236
5.5	0.00173857
5.52	0.0122167
5.54	-0.00565493
5.56	-0.0129266
5.58	-0.0145442
5.6	-0.0199468
5.62	-0.0253952
5.64	-0.0313593
5.66	-0.029705
5.68	-0.0170678
5.7	-0.0195163
5.72	-0.0162352
5.74	-0.0164413
5.76	-0.00727194
5.78	0.00121507
5.8	0.0130109
5.82	0.0209279
5.84	0.0225354
5.86	0.0302656
5.88	0.0422478
5.9	0.0448464
5.92	0.0381258
5.94	0.0324062
5.96	0.0242923
5.98	0.020806
6	0.0306393
6.02	0.0373508
6.04	0.048483
6.06	0.058559
6.08	0.0673636
6.1	0.0597644
6.12	0.0549224
6.14	0.0362104
6.16	0.036313
6.18	0.00470155
6.2	-0.0492112
6.22	-0.0747566
6.24	-0.057446
6.26	-0.0464357
6.28	-0.0244517
6.3	-0.00672042
6.32	0.0114317
6.34	0.0275826
6.36	0.045538
6.38	0.0651478
6.4	0.0919023
6.42	0.112723
6.44	0.141806
6.46	0.134212
6.48	0.106842
6.5	0.086169
6.52	0.0822531
6.54	0.085319
6.56	0.0772994
6.58	0.0829823
6.6	0.0916916
6.62	0.111761
6.64	0.0295273
6.66	-0.139113
6.68	-0.194238
6.7	-0.187157
6.72	-0.191252
6.74	-0.17099
6.76	-0.162379
6.78	-0.165008
6.8	-0.16499
6.82	-0.169964
6.84	-0.153494
6.86	-0.127168
6.88	-0.102748
6.9	-0.0743545
6.92	-0.0412484
6.94	-0.00285078
6.96	0.0324997
6.98	0.0721112
7	0.107648
7.02	0.148099
7.04	0.182046
7.06	0.224182
7.08	0.253924
7.1	0.282513
7.12	0.297956
7.14	0.318118
7.16	0.262526
7.18	0.215956
7.2	-0.113135
7.22	-0.223073
7.24	-0.154447
7.26	-0.175588
7.28	-0.103499
7.3	-0.0716532
7.32	-0.0173197
7.34	0.00930015
7.36	0.0486698
7.38	0.0823933
7.4	0.109709
7.42	0.162966
7.44	0.0526883
7.46	-0.247183
7.48	-0.145745
7.5	-0.162874
7.52	-0.0957403
7.54	-0.0553804
7.56	0.0210121
7.58	-0.0638773
7.6	-0.186214
7.62	-0.154639
7.64	-0.158633
7.66	-0.139681
7.68	-0.116195
7.7	-0.094806
7.72	-0.0713262
7.74	-0.0501272
7.76	-0.0264614
7.78	-0.00535576
7.8	0.0164504
7.82	-0.0101136
7.84	-0.0415937
7.86	-0.079561
7.88	-0.0900016
7.9	-0.0681486
7.92	-0.0571007
7.94	-0.0324429
7.96	-0.0111972
7.98	0.0160767
8	0.0381541
8.02	0.061699
8.04	-0.0101603
8.06	-0.0359768
8.08	-0.00482301
8.1	-0.000168242
8.12	0.0310689
8.14	0.051623
8.16	0.081459
8.18	0.104433
8.2	0.126335
8.22	0.0192919
8.24	0.0214701
8.26	0.0626709
8.28	0.0633441
8.3	0.12203
8.32	0.125419
8.34	0.18953
8.36	-0.0880578
8.38	-0.123394
8.4	-0.0657093
8.42	-0.0521744
8.44	0.00571099
8.46	0.061961
8.48	-0.100742
8.5	-0.140203
8.52	-0.101108
8.54	-0.109728
8.56	-0.0722147
8.58	-0.0533433
8.6	-0.0210772
8.62	-0.0128616
8.64	-0.0639707
8.66	-0.0313593
8.68	-0.0324621
8.7	-0.011254
8.72	0.000644937
8.74	0.026891
8.76	0.0446788
8.78	0.0557826
8.8	0.019825
8.82	-0.00401922
8.84	-0.023816
8.86	0.00617833
8.88	0.0188247
8.9	0.052081
8.92	0.0763175
8.94	0.111734
8.96	0.137281
8.98	0.161372
9	0.0384903
9.02	0.00174791
9.04	0.023358
9.06	0.026433
9.08	-0.00597269
9.1	-0.0146743
9.12	0.0125437
9.14	0.0183292
9.16	0.0458376
9.18	0.0593815
9.2	0.088656
9.22	0.104534
9.24	0.134478
9.26	0.151387
9.28	0.181038
9.3	0.172611
9.32	0.184693
9.34	0.164495
9.36	0.116112
9.38	-0.113648
9.4	-0.0513711
9.42	-0.036705
9.44	-0.0297608
9.46	-0.105303
9.48	-0.155931
9.5	-0.231098
9.52	-0.189942
9.54	-0.172281
9.56	-0.123742
9.58	-0.0904788
9.6	-0.0310039
9.62	0.0136649
9.64	0.0756634
9.66	0.122579
9.68	0.169341
9.7	-0.00611293
9.72	-0.0163662
9.74	0.0259659
9.76	0.0412292
9.78	0.0912263
9.8	0.132564
9.82	0.172565
9.84	0.229046
9.86	0.156883
9.88	-0.129486
9.9	-0.0939724
9.92	-0.102262
9.94	-0.0853565
9.96	-0.044295
9.98	-0.117395
10	-0.197755
10.02	-0.15168
10.04	-0.158569
10.06	-0.122597
10.08	-0.10425
10.1	-0.072757
10.12	-0.0480524
10.14	-0.0513336
10.16	-0.112521
10.18	-0.113465
10.2	-0.108573
10.22	-0.107465
10.24	-0.0673352
10.26	-0.0514545
10.28	0.00568296
10.3	-0.0755517
10.32	-0.152999
10.34	-0.0806639
10.36	-0.0900767
10.38	-0.0373691
10.4	-0.0139736
10.42	0.0294805
10.44	0.0603534
10.46	0.0815616
10.48	0.0439304
10.5	0.0182174
10.52	-0.00269194
10.54	0.027022
10.56	0.0414444
10.58	0.0731215
10.6	0.0964365
10.62	0.126142
10.64	0.150013
10.66	0.173738
10.68	0.119648
10.7	0.0596426
10.72	0.0190116
10.74	0.0291902
10.76	0.0348263
10.78	0.0462204
10.8	0.0219556
10.82	-0.00796361
10.84	-0.0156938
10.86	-0.0106558
10.88	-0.0213767
10.9	-0.0232462
10.92	-0.0146184
10.94	-0.00649609
10.96	0.0138151
10.98	0.035397
11	0.0542217
11.02	0.0238343
11.04	-0.00371072
11.06	-0.0399861
11.08	-0.0122817
11.1	0.00892633
11.12	0.0216661
11.14	-0.0119923
11.16	-0.00448657
11.18	0.00757101
11.2	0.0198433
11.22	0.0356306
11.24	0.0479031
11.26	0.0148053
11.28	-0.00272931
11.3	-0.0102161
11.32	0.000747758
11.34	0.00728128
11.36	0.00357057
11.38	-0.00867397
11.4	-0.00303773
11.42	-0.00127122
11.44	0.00389767
11.46	0.00818794
11.48	-0.00486039
11.5	-0.0281432
11.52	-0.0389584
11.54	-0.0225171
11.56	-0.0216478
11.58	-0.0162352
11.6	-0.0116185
11.62	-0.00134597
11.64	0.019432
11.66	-0.00973983
11.68	-0.00802901
11.7	-0.00280406
11.72	-0.00940274
11.74	-0.00997341
11.76	-0.00873003
11.78	0.000233672
11.8	0.00736537
11.82	0.0224044
11.84	0.0337519
11.86	0.0663633
11.88	0.0734018
11.9	0.0176843
11.92	-0.0239745
11.94	-0.0110854
11.96	-0.00329943
11.98	0.0153851
12	0.00513143
12.02	-0.0199276
12.04	-0.042987
12.06	-0.0394439
12.08	-0.019498
12.1	-0.00343033
12.12	0.015572
12.14	0.0305175
12.16	0.0398927
12.18	0.0121233
12.2	-0.0142072
12.22	-0.0184226
12.24	-0.00689803
12.26	-0.0185911
12.28	-0.0120198
12.3	-0.00445845
12.32	0.0057577
12.34	0.0132261
12.36	0.0256856
12.38	0.0224044
12.4	0.00822531
12.42	-1.86937e-05
12.44	0.0195539
12.46	0.0414069
12.48	0.0468561
12.5	0.0186195
12.52	0.00948701
12.54	-0.00127122
12.56	-0.00105624
12.58	0.00566427
12.6	0.009618
12.62	0.0246477
12.64	0.035331
12.66	0.0499037
12.68	0.0515204
12.7	0.0405751
12.72	0.0381725
12.74	0.0531097
12.76	0.071644
12.78	0.0349949
12.8	0.0394164
12.82	0.0100476
12.84	-0.018058
12.86	-0.0223669
12.88	-0.0368269
12.9	-0.037687
12.92	-0.042987
12.94	-0.0395373
12.96	-0.0417623
12.98	-0.0043837
13	0.0177035
13.02	-0.0184885
13.04	-0.0449124
13.06	-0.0485663
13.08	-0.0327516
13.1	-0.0368736
13.12	-0.0276953
13.14	-0.0285453
13.16	-0.0236575
13.18	-0.0237693
13.2	-0.0240212
13.22	-0.0312374
13.24	-0.0277511
13.26	-0.0192644
13.28	-0.0061503
13.3	0.00916
13.32	0.027415
13.34	0.0300127
13.36	0.0346211
13.38	0.0329201
13.4	0.0346211
13.42	0.0278821
13.44	0.0296766
13.46	0.0115251
13.48	0.0211798
13.5	0.0137776
13.52	0.0370797
13.54	-0.0794025
13.56	-0.124906
13.58	-0.124365
13.6	-0.125364
13.62	-0.110424
13.64	-0.0961983
13.66	-0.0763926
13.68	-0.0596426
13.7	-0.0404066
13.72	-0.0229092
13.74	-0.0045146
13.76	-0.00729063
13.78	-0.0159082
13.8	-0.0125245
13.82	0.00904788
13.84	0.0164504
13.86	0.00577639
13.88	0.0258907
13.9	0.0555023
13.92	0.0822623
13.94	0.113263
13.96	0.159659
13.98	0.104955
14	-0.101594
14.02	-0.0330978
14.04	-0.040369
14.06	-0.0209562
14.08	-0.0885058
14.1	-0.0602133
14.12	-0.0545863
14.14	-0.0615213
14.16	-0.05038
14.18	-0.00142072
14.2	0.0365466
14.22	0.1013
14.24	0.157213
14.26	0.0896095
14.28	0.0393413
14.3	0.0634376
14.32	0.013544
14.34	-0.007786
14.36	-0.0474076
14.38	-0.0762149
14.4	-0.106476
14.42	-0.106412
14.44	-0.073869
14.46	-0.0334157
14.48	0.00389767
14.5	0.0520068
14.52	0.111285
14.54	0.151543
14.56	-0.0240688
14.58	0.00423412
14.6	-0.00407528
14.62	0.00291627
14.64	0.0147961
14.66	0.051231
14.68	0.0757285
14.7	-0.0181331
14.72	-0.0540156
14.74	-0.0147778
14.76	-0.0152358
14.78	-0.00160767
14.8	0.00802901
14.82	0.036705
14.84	0.0540999
14.86	0.0713729
14.88	0.075963
14.9	0.0563056
14.92	0.0294989
14.94	0.00311257
14.96	0.00704761
14.98	-0.0369954
15	-0.0410982
15.02	-0.00644937
15.04	0.01675
15.06	0.0539222
15.08	0.00972059
15.1	-0.00423412
15.12	0.00513143
15.14	-0.010599
15.16	-0.0253585
15.18	-0.0399678
15.2	-0.0319199
15.22	-0.022965
15.24	-0.00940274
15.26	0.0200119
15.28	0.049464
15.3	0.0806547
15.32	0.107868
15.34	0.0693265
15.36	0.0230777
15.38	-0.0335925
15.4	-0.0244233
15.42	-0.019498
15.44	-0.0807106
15.46	-0.0901793
15.48	-0.0541841
15.5	-0.0306576
15.52	0.0080477
15.54	0.0249372
15.56	0.0483144
15.58	0.0344526
15.6	0.00838424
15.62	-0.00454263
15.64	-0.0187404
15.66	-0.0289566
15.68	-0.0214701
15.7	-0.0344993
15.72	-0.0506603
15.74	-0.0668588
15.76	-0.074327
15.78	-0.0482769
15.8	-0.0310689
15.82	-0.000439304
15.84	0.00676722
15.86	-0.00289758
15.88	0.00019629
15.9	-0.0151607
15.92	-0.0376778
15.94	-0.00695409
15.96	0.00800099
15.98	0.0354529
16	0.0580817
16.02	0.0626342
16.04	0.0243207
16.06	-0.00487907
16.08	-0.0437527
16.1	-0.032845
16.12	-0.02218
16.14	-0.00408463
16.16	0.0122817
16.18	0.0358083
16.2	0.0230026
16.22	-0.0208628
16.24	-0.0395465
16.26	-0.063139
16.28	-0.0613537
16.3	-0.0548382
16.32	-0.0475386
16.34	-0.0378555
16.36	-0.0284986
16.38	-0.024601
16.4	-0.0502115
16.42	-0.0584655
16.44	-0.084534
16.46	-0.103261
16.48	-0.0820379
16.5	-0.0717942
16.52	-0.0541191
16.54	-0.0440523
16.56	-0.0308729
16.58	-0.0184693
16.6	0.00210304
16.62	0.019825
16.64	0.0405843
16.66	0.0573718
16.68	0.0718684
16.7	0.0872627
16.72	0.099789
16.74	0.105651
16.76	0.111083
16.78	0.116552
16.8	0.124787
16.82	0.14896
16.84	0.16804
16.86	0.190354
16.88	0.115572
16.9	0.0412383
16.92	-0.0130667
16.94	-0.062353
16.96	-0.0518758
16.98	-0.064905
17	-0.092003
17.02	-0.116625
17.04	-0.110259
17.06	-0.0983234
17.08	-0.0860756
17.1	-0.0696536
17.12	-0.0757285
17.14	-0.0796828
17.16	-0.0805146
17.18	-0.0809259
17.2	-0.0817576
17.22	-0.0814214
17.24	-0.0829072
17.26	-0.0505018
17.28	0.0046454
17.3	0.019759
17.32	0.0226664
17.34	0.053848
17.36	0.0290876
17.38	0.0216661
17.4	0.0450425
17.42	0.0546421
17.44	0.0487532
17.46	0.0327424
17.48	0.0180773
17.5	0.0181331
17.52	0.0456223
17.54	0.0315736
17.56	0.0265264
17.58	0.0398643
17.6	0.0219281
17.62	0.00768322
17.64	0.00675788
17.66	-0.014394
17.68	-0.0076551
17.7	-0.00236475
17.72	0.00652412
17.74	0.00350507
17.76	-0.0140579
17.78	-0.0301721
17.8	-0.0230585
17.82	-0.0032714
17.84	0.0164596
17.86	0.0391352
17.88	0.0404533
17.9	0.0471557
17.92	0.0429586
17.94	0.0440523
17.96	0.0174223
17.98	0.0200027
18	0.0249656
18.02	0.0359667
18.04	0.0464449
18.06	0.0531463
18.08	0.0542776
18.1	0.0760188
18.12	0.0737847
18.14	0.087871
18.16	0.0315177
18.18	0.00335558
18.2	-0.0122442
18.22	-0.033303
18.24	-0.0405843
18.26	-0.0397709
18.28	-0.0264889
18.3	-0.0261436
18.32	0.00611293
18.34	0.0390793
18.36	-0.0224136
18.38	-0.0371163
18.4	-0.00859922
18.42	0.0120298
18.44	0.0407336
18.46	0.00154227
18.48	-0.0660271
18.5	-0.0754015
18.52	-0.0243491
18.54	-0.0136282
18.56	0.0064774
18.58	-0.011777
18.6	-0.0243858
18.62	-0.0321718
18.64	-0.0260776
18.66	-0.0291902
18.68	-0.0196473
18.7	-0.00733734
18.72	-0.0045146
18.74	0.00873003
18.76	0.0266858
18.78	0.0310506
18.8	0.088459
18.82	0.0828229
18.84	0.0157213
18.86	-0.0349573
18.88	-0.0939266
18.9	-0.0765703
18.92	-0.0705696
18.94	-0.0515296
18.96	-0.0318823
18.98	-0.0131235
19	0.00185069
19.02	0.0126655
19.04	0.0464165
19.06	-0.00323403
19.08	-0.046781
19.1	-0.0346495
19.12	-0.0656717
19.14	-0.0494264
19.16	-0.0357616
19.18	0.00701958
19.2	0.0579791
19.22	0.0773928
19.24	0.118164
19.26	0.128524
19.28	0.110396
19.3	0.0689711
19.32	0.0199184
19.34	-0.00945953
19.36	-0.0223394
19.38	0.00568296
19.4	0.0157964
19.42	0.0496041
19.44	0.0361637
19.46	0.00296299
19.48	-0.00879543
19.5	-0.0185444
19.52	-0.0030097
19.54	-0.000691672
19.56	-0.0120765
19.58	-0.0208811
19.6	-0.0294613
19.62	-0.0491086
19.64	-0.069093
19.66	-0.0553713
19.68	-0.0260034
19.7	-0.0178904
19.72	0.00259842
19.74	0.00790755
19.76	0.0116653
19.78	0.0194045
19.8	0.0397059
19.82	0.00725325
19.84	-0.0523613
19.86	-0.053128
19.88	-0.0238536
19.9	-0.00882355
19.92	0.0222267
19.94	0.0370797
19.96	0.0158807
19.98	-0.00376678
20	-0.0238444
20.02	-0.00264522
20.04	0.0219657
20.06	0.0438187
20.08	0.0720645
20.1	0.0569038
20.12	0.0298259
20.14	-0.00253301
20.16	-0.0193386
20.18	-0.0243024
20.2	-0.0209187
20.22	-0.0114967
20.24	0.00357991
20.26	0.0213208
20.28	-0.00426224
20.3	-0.0213859
20.32	-0.0450993
20.34	-0.0351167
20.36	-0.0192919
20.38	-0.00286012
20.4	0.0148337
20.42	-0.00864594
20.44	-0.000579507
20.46	0.0203389
20.48	0.0339204
20.5	0.055025
20.52	0.0472024
20.54	0.0392479
20.56	0.0311348
20.58	0.0460803
20.6	0.0600356
20.62	0.0627277
20.64	0.0150856
20.66	-0.0169927
20.68	-0.0502399
20.7	-0.0631481
20.72	-0.0371356
20.74	-0.0218255
20.76	-0.00403791
20.78	0.0100668
20.8	-0.0128991
20.82	-0.0338544
20.84	-0.0489684
20.86	-0.0323403
20.88	-0.0212833
20.9	-0.00213107
20.92	0.0123843
20.94	0.00554272
20.96	-0.00676722
20.98	-0.0121975
21	-0.0309571
21.02	-0.033303
21.04	-0.00934686
21.06	0.00587925
21.08	0.0280598
21.1	0.0431921
21.12	0.0555581
21.14	0.052932
21.16	0.0300595
21.18	-0.00771125
21.2	-0.0733918
21.22	-0.0576988
21.24	-0.0416872
21.26	-0.0203856
21.28	0.00216845
21.3	0.0318823
21.32	0.0266758
21.34	0.0104964
21.36	0.0309013
21.38	0.0288357
21.4	0.0230685
21.42	0.0184785
21.44	0.0178528
21.46	0.015507
21.48	0.00133663
21.5	-0.0141888
21.52	-0.0326673
21.54	-0.0323962
21.56	-0.0141421
21.58	-0.00330878
21.6	0.0153192
21.62	-0.00963632
21.64	-0.0243766
21.66	-0.0267225
21.68	-0.0367893
21.7	-0.0232462
21.72	-0.0205917
21.74	-0.0176092
21.76	-0.0167408
21.78	-0.00413134
21.8	-0.00298167
21.82	-0.0178437
21.84	-0.0119263
21.86	0.00759904
21.88	0.0316487
21.9	0.0644562
21.92	0.0846741
21.94	0.0792432
21.96	0.0706721
21.98	0.0474919
22	0.0170486
22.02	0.000962716
22.04	-0.0180773
22.06	-0.014525
22.08	-0.00711301
22.1	0.0015703
22.12	0.0117962
22.14	0.0197316
22.16	0.00200027
22.18	-0.0119364
22.2	-0.0309663
22.22	-0.0488283
22.24	-0.0663724
22.26	-0.0544177
22.28	-0.0433515
22.3	-0.0289658
22.32	-0.0137024
22.34	-0.00108427
22.36	-0.016946
22.38	-0.0299477
22.4	-0.0435567
22.42	-0.0367426
22.44	-0.032322
22.46	-0.0297141
22.48	-0.0407061
22.5	-0.0460427
22.52	-0.044426
22.54	-0.0393788
22.56	-0.0337427
22.58	-0.0259942
22.6	-0.0240871
22.62	-0.0130667
22.64	-0.00630922
22.66	0.0473325
22.68	0.0675596
22.7	0.0820379
22.72	0.0731866
22.74	0.0714947
22.76	0.041155
22.78	0.00749627
22.8	0.00135531
22.82	-0.0117395
22.84	-0.00123376
22.86	0.00286955
22.88	0.00990746
22.9	0.00980486
22.92	0.018255
22.94	0.0192736
22.96	0.00715039
22.98	-0.0051034
23	-0.00646806
23.02	0.00670173
23.04	0.0101878
23.06	0.0139177
23.08	-0.000542125
23.1	-0.014656
23.12	-0.0171512
23.14	-0.000429961
23.16	0.0148337
23.18	0.0100577
23.2	-0.0103847
23.22	-0.0279664
23.24	-0.0284894
23.26	-0.00858988
23.28	-0.00500997
23.3	0.000682328
23.32	0.00229934
23.34	0.00500063
23.36	0.00577639
23.38	0.00941282
23.4	0.0130017
23.42	0.0169176
23.44	0.020872
23.46	0.0247879
23.48	0.0287422
23.5	0.0327516
23.52	0.0366116
23.54	0.0447347
23.56	0.0372849
23.58	0.0226948
23.6	0.011319
23.62	-0.00691672
23.64	-0.0110012
23.66	0.00553337
23.68	0.00313125
23.7	-0.0228624
23.72	-0.052277
23.74	-0.058362
23.76	-0.0545954
23.78	-0.0380699
23.8	-0.00570164
23.82	0.025975
23.84	0.026564
23.86	-0.00139269
23.88	-0.00491645
23.9	-0.00969311
23.92	-0.0199468
23.94	-0.0382851
23.96	-0.0477905
23.98	-0.0201337
24	0.00354245
24.02	0.00801033
24.04	0.01374
24.06	0.0166281
24.08	0.0244141
24.1	0.0308445
24.12	0.0373224
24.14	0.0160016
24.16	-0.0119172
24.18	-0.029508
24.2	-0.0263955
24.22	-0.0261243
24.24	-0.0276018
24.26	-0.0309755
24.28	-0.0220683
24.3	-0.00638397
24.32	0.0125245
24.34	0.0358733
24.36	0.0384253
24.38	0.0236475
24.4	0.015441
24.42	-0.00298167
24.44	-0.0134313
24.46	-0.0262461
24.48	-0.028658
24.5	-0.00959968
24.52	0.00967388
24.54	0.0320976
24.56	0.0547356
24.58	0.0404258
24.6	0.0142731
24.62	0.000140203
24.64	-0.0117028
24.66	-0.0244325
24.68	-0.030948
24.7	-0.0325556
24.72	-0.0360886
24.74	-0.0367518
24.76	-0.0446788
24.78	-0.0440431
24.8	-0.0370046
24.82	-0.0372098
24.84	-0.031864
24.86	-0.0166465
24.88	-0.00437436
24.9	0.00495391
24.92	-0.000822531
24.94	-0.0058886
24.96	-0.0148337
24.98	-0.0098983
25	0.0127397
25.02	0.0343124
25.04	0.062092
25.06	0.0677748
25.08	0.0721863
25.1	0.0699247
25.12	0.059671
25.14	0.0460995
25.16	0.025648
25.18	-0.00325272
25.2	-0.0259475
25.22	-0.0350324
25.24	-0.045015
25.26	-0.0391453
25.28	-0.0379114
25.3	-0.0249372
25.32	-0.00388833
25.34	0.0230118
25.36	0.0407904
25.38	0.057315
25.4	0.0432205
25.42	0.0273957
25.44	0.0127397
25.46	-0.00419675
25.48	-0.0247412
25.5	-0.0386873
25.52	-0.0153943
25.54	0.00094403
25.56	0.0247036
25.58	0.0458
25.6	0.0608673
25.62	0.0526233
25.64	0.0395565
25.66	0.0180305
25.68	-0.00354245
25.7	-0.0274892
25.72	-0.0486881
25.74	-0.0653539
25.76	-0.0858045
25.78	-0.0798413
25.8	-0.0580442
25.82	-0.0343317
25.84	0.00905722
25.86	0.0296857
25.88	0.0559694
25.9	0.0581944
25.92	0.0368928
25.94	0.0336025
25.96	0.0299752
25.98	0.0237784
26	0.00267325
26.02	-0.017731
26.04	-0.0138801
26.06	-0.000635594
26.08	0.0101319
26.1	0.0274983
26.12	0.0390051
26.14	0.0533808
26.16	0.0504918
26.18	0.030097
26.2	0.0162727
26.22	-0.0015049
26.24	-0.0168242
26.26	-0.0250682
26.28	-0.0338453
26.3	-0.041351
26.32	-0.0490903
26.34	-0.0444443
26.36	-0.034612
26.38	-0.0269753
26.4	-0.0175158
26.42	-0.0165164
26.44	-0.0140762
26.46	-0.0104497
26.48	-0.00417806
26.5	0.000841227
26.52	0.0062811
26.54	-0.0015049
26.56	-0.00971143
26.58	-0.0185252
26.6	-0.0293587
26.62	-0.0356489
26.64	-0.031144
26.66	-0.0262178
26.68	-0.0299477
26.7	-0.0374442
26.72	-0.044819
26.74	-0.0520435
26.76	-0.0595024
26.78	-0.0513052
26.8	-0.0410148
26.82	-0.00019629
26.84	0.0243116
26.86	0.0389584
26.88	0.0608389
26.9	0.0546421
26.92	0.0449399
26.94	0.0364064
26.96	0.0366024
26.98	0.0322753
27	0.0339763
27.02	0.00123376
27.04	-0.0231528
27.06	-0.042529
27.08	-0.0434541
27.1	-0.0202921
27.12	-0.00551469
27.14	0.015768
27.16	0.0337235
27.18	0.0475294
27.2	0.0352101
27.22	0.0265823
27.24	0.0152825
27.26	0.00422478
27.28	-0.0020283
27.3	0.00233672
27.32	0.00459869
27.34	0.009618
27.36	0.013086
27.38	0.00913197
27.4	0.00586991
27.42	0.00238343
27.44	-0.00245827
27.46	-0.00257973
27.48	0.000794493
27.5	-0.00203764
27.52	-0.011188
27.54	-0.0216845
27.56	-0.037556
27.58	-0.049268
27.6	-0.0651478
27.62	-0.0299385
27.64	-0.00450525
27.66	0.00901976
27.68	0.0310039
27.7	0.0449023
27.72	0.0479031
27.74	0.0336676
27.76	0.0322753
27.78	0.028789
27.8	0.0269377
27.82	0.0247604
27.84	0.0159833
27.86	-0.000308445
27.88	-0.0195539
27.9	-0.0339763
27.92	-0.0287322
27.94	-0.0276293
27.96	-0.0259375
27.98	-0.0220399
28	-0.0246477
28.02	-0.0286955
28.04	-0.0340138
28.06	-0.0332847
28.08	-0.0286012
28.1	-0.0179738
28.12	0.00194412
28.14	0.0183667
28.16	0.015114
28.18	0.0120949
28.2	0.0132261
28.22	0.0103004
28.24	0.0102161
28.26	0.00860857
28.28	0.00843096
28.3	0.0017666
28.32	-0.0121507
28.34	-0.0231153
28.36	-0.0406686
28.38	-0.0404158
28.4	-0.0279756
28.42	-0.0180021
28.44	-0.00443042
28.46	0.00900107
28.48	0.0157405
28.5	0.0137492
28.52	0.0161985
28.54	0.0071971
28.56	-0.00541191
28.58	-0.0202079
28.6	-0.0218722
28.62	0.00548666
28.64	0.02447
28.66	0.0250123
28.68	0.00782337
28.7	-0.00398176
28.72	-0.0212549
28.74	-0.0072626
28.76	0.00284143
28.78	0.0168342
28.8	0.0289099
28.82	0.0445845
28.84	0.0428184
28.86	0.0153192
28.88	-0.00551469
28.9	-0.037229
28.92	-0.0416029
28.94	-0.0227507
28.96	-0.00955296
28.98	0.0200494
29	0.0242648
29.02	0.0110671
29.04	0.000607555
29.06	-0.0159549
29.08	-0.035855
29.1	-0.0531747
29.12	-0.0731582
29.14	-0.0581376
29.16	-0.0240963
29.18	0.00382293
29.2	0.0424447
29.22	0.072887
29.24	0.102913
29.26	0.0887677
29.28	0.0455105
29.3	0.0110854
29.32	-0.036378
29.34	-0.0794025
29.36	-0.114811
29.38	-0.0810944
29.4	-0.0578014
29.42	-0.021657
29.44	0.0137867
29.46	0.04423
29.48	0.0299477
29.5	0.0228157
29.52	0.00862725
29.54	0.0208436
29.56	0.0313309
29.58	0.0468278
29.6	0.0552495
29.62	0.0481276
29.64	0.0513143
29.66	0.055222
29.68	0.0573901
29.7	0.055025
29.72	0.0432673
29.74	0.0143665
29.76	-0.00749627
29.78	-0.0219089
29.8	-0.0286204
29.82	-0.0311724
29.84	-0.0343317
29.86	-0.0462204
29.88	-0.0620077
29.9	-0.0680084
29.92	-0.0735979
29.94	-0.0795143
29.96	-0.0532306
29.98	-0.0199743
30	0.0116369
30.02	0.0351634
30.04	0.045277
30.06	0.0334807
30.08	0.023031
30.1	0.0143098
30.12	0.0348923
30.14	0.0550626
30.16	0.0585397
30.18	0.0341256
30.2	0.0199367
30.22	0.0032714
30.24	0.00179463
30.26	-0.00626242
30.28	-0.027087
30.3	-0.035986
30.32	-0.0430703
30.34	-0.0476787
30.36	-0.0729905
30.38	-0.0591754
30.4	-0.0180305
30.42	0.0171887
30.44	0.0472116
30.46	0.0690646
30.48	0.0696444
30.5	0.0520535
30.52	0.0421644
30.54	0.0485856
30.56	0.0589794
30.58	0.0678399
30.6	0.079169
30.62	0.0861599
30.64	0.0907591
30.66	0.0863467
30.68	0.0757101
30.7	0.0241897
30.72	-0.0273866
30.74	-0.0847016
30.76	-0.127864
30.78	-0.0807765
30.8	-0.0441173
30.82	0.00708499
30.84	0.0551469
30.86	0.0764393
30.88	0.0515955
30.9	0.0276485
30.92	-0.00140203
30.94	-0.0360043
30.96	-0.0328075
30.98	-0.0023554
31	0.0164596
31.02	0.058689
31.04	0.0943205
31.06	0.104397
31.08	0.103105
31.1	0.0873846
31.12	0.0748784
31.14	0.0563523
31.16	0.0471181
31.18	0.018778
31.2	-0.0191426
31.22	-0.0539322
31.24	-0.0957861
31.26	-0.12497
31.28	-0.114857
31.3	-0.113282
31.32	-0.0943846
31.34	-0.0716907
31.36	-0.0515671
31.38	-0.0461646
31.4	-0.0382009
31.42	-0.0276577
31.44	-0.0167967
31.46	-0.0136374
31.48	-0.00949617
31.5	-0.00512209
31.52	0.0014394
31.54	0.00702893
31.56	0.00293496
31.58	-0.00314994
31.6	-0.00602875
31.62	-0.00361728
31.64	-0.00154227
31.66	0.00666436
31.68	0.018843
31.7	0.0301346
31.72	0.041743
31.74	0.0535017
31.76	0.0522212
31.78	0.0429494
31.8	0.0277328
31.82	0.00958044
31.84	-0.000672976
31.86	-0.00349573
31.88	-0.00674845
31.9	-0.00985158
31.92	-0.0190867
31.94	-0.0179738
31.96	0.00204699
31.98	0.0121233
32	0.0224237
32.02	0.02447
32.04	0.0244893
32.06	0.0140954
32.08	-0.00204699
32.1	-0.00926259
32.12	-0.0204607
32.14	-0.0159924
32.16	-0.0114784
32.18	-0.00635594
32.2	-0.0123193
32.22	-0.0156096
32.24	-0.0182916
32.26	-0.0229843
32.28	-0.022311
32.3	-0.0167216
32.32	-0.0118329
32.34	-0.0176467
32.36	-0.0250123
32.38	-0.0305367
32.4	-0.0316396
32.42	-0.0427809
32.44	-0.0404258
32.46	-0.0315553
32.48	-0.0201337
32.5	-0.00678591
32.52	0.00258907
32.54	-4.67343e-05
32.56	-0.00890764
32.58	-0.00864594
32.6	-0.0142264
32.62	-0.0156471
32.64	-0.0224512
32.66	-0.0305083
32.68	-0.0395465
32.7	-0.0430236
32.72	-0.0373032
32.74	-0.0329201
32.76	-0.0243024
32.78	-0.0163762
32.8	-0.00204699
32.82	0.0142914
32.84	0.026368
32.86	0.0335458
32.88	0.0329201
32.9	0.024863
32.92	0.00927175
32.94	-0.00448657
32.96	-0.011843
32.98	-0.0231711
33	-0.0215636
33.02	-0.012039
33.04	-0.00650543
33.06	0.00142072
33.08	0.00854307
33.1	0.0184418
33.12	0.0265924
33.14	0.0338636
33.16	0.0289291
33.18	0.0166749
33.2	0.00211239
33.22	-0.0148245
33.24	-0.0299385
33.26	-0.0207034
33.28	-0.0111505
33.3	0.00116836
33.32	0.0141888
33.34	0.0276293
33.36	0.0226005
33.38	0.0124878
33.4	0.00943114
33.42	0.0020283
33.44	-0.00103755
33.46	-0.00236475
33.48	-0.00345836
33.5	-0.00469212
33.52	-0.00841227
33.54	-0.0146936
33.56	-0.0139269
33.58	-0.00729997
33.6	-8.41227e-05
33.62	-0.00206567
33.64	-0.0139177
33.66	-0.0212265
33.68	-0.0350324
33.7	-0.0343033
33.72	-0.0235357
33.74	-0.0155161
33.76	-0.001374
33.78	0.0141229
33.8	0.0281624
33.82	0.0365557
33.84	0.037883
33.86	0.0358174
33.88	0.0306952
33.9	0.0169368
33.92	0.0116277
33.94	0.00637463
33.96	-0.000140203
33.98	-0.00651478
34	-0.0121975
34.02	-0.0121233
34.04	-0.010796
34.06	-0.00969311
34.08	-0.00788878
34.1	-0.0133287
34.12	-0.0191984
34.14	-0.0252926
34.16	-0.0327516
34.18	-0.0337051
34.2	-0.0277887
34.22	-0.0213575
34.24	0.00165439
34.26	0.00911328
34.28	0.0189465
34.3	0.0237876
34.32	0.018582
34.34	0.0148245
34.36	0.00998257
34.38	0.0144508
34.4	0.0184885
34.42	0.0224887
34.44	0.0131602
34.46	0.00500997
34.48	-0.00617833
34.5	-0.0091884
34.52	-0.00243958
34.54	0.001374
34.56	0.0093377
34.58	0.00866463
34.6	0.00363597
34.62	-0.000121507
34.64	-0.00617833
34.66	-0.00936518
34.68	-0.0101878
34.7	-0.010861
34.72	-0.0122442
34.74	-0.0158147
34.76	-0.0186003
34.78	-0.00983326
34.8	-0.000934686
34.82	0.00502866
34.84	0.0120573
34.86	0.018582
34.88	0.0186095
34.9	0.0156938
34.92	0.0133754
34.94	0.0100852
34.96	0.011973
34.98	0.0141046
35	0.0128148
35.02	0.0108335
35.04	0.00907591
35.06	0.00550534
35.08	-0.00260776
35.1	-0.0047763
35.12	-0.00784206
35.14	-0.0167408
35.16	-0.0299853
35.18	-0.0393504
35.2	-0.0483987
35.22	-0.0442107
35.24	-0.0368085
35.26	-0.0271997
35.28	-0.0102629
35.3	0.00458
35.32	0.0123568
35.34	0.0145809
35.36	0.0165631
35.38	0.0181331
35.4	0.0238536
35.42	0.0308445
35.44	0.0306768
35.46	0.0234606
35.48	0.0161885
35.5	0.00411266
35.52	-0.00792624
35.54	-0.0178528
35.56	-0.0213859
35.58	-0.0285078
35.6	-0.0258724
35.62	-0.0213107
35.64	-0.0162352
35.66	-0.0114033
35.68	-0.0117495
35.7	-0.0121416
35.72	-0.00744955
35.74	-0.00251433
35.76	0.00367334
35.78	0.00599137
35.8	0.0051689
35.82	0.00458934
35.84	0.00601006
35.86	0.0116927
35.88	0.0167591
35.9	0.0226289
35.92	0.028723
35.94	0.0277695
35.96	0.023489
35.98	0.0201053
36	0.0152633
36.02	0.017862
36.04	0.0218997
36.06	0.0262745
36.08	0.0281624
36.1	0.0182357
36.12	0.00993585
36.14	-0.0037294
36.16	-0.0152074
36.18	-0.0301813
36.2	-0.0312841
36.22	-0.0205541
36.24	-0.013805
36.26	-0.00101878
36.28	0.00105624
36.3	-0.005038
36.32	-0.00941282
36.34	-0.0118613
36.36	-0.0133379
36.38	-0.0121416
36.4	-0.00969311
36.42	-0.00672042
36.44	-0.00165439
36.46	0.00300036
36.48	0.00797296
36.5	0.0146844
36.52	0.022377
36.54	0.0297324
36.56	0.0319107
36.58	0.0296482
36.6	0.0199468
36.62	0.00674845
36.64	0.000878609
36.66	-0.00147678
36.68	-0.00435567
36.7	-0.00708499
36.72	-0.0112723
36.74	-0.014656
36.76	-0.0108051
36.78	-0.00530904
36.8	-0.00052343
36.82	-0.000355188
36.84	-0.000243024
36.86	0.00123376
36.88	0.00433699
36.9	0.00665501
36.92	0.00807573
36.94	0.00908525
36.96	0.0116277
36.98	0.0136649
37	0.0161234
37.02	0.0186287
37.04	0.0239745
37.06	0.0295648
37.08	0.0268727
37.1	0.021526
37.12	0.00986074
37.14	-0.000158899
37.16	-0.000981402
37.18	-0.00343033
37.2	-0.0049071
37.22	-0.00782337
37.24	-0.00481367
37.26	-0.00071971
37.28	0.00350507
37.3	0.00890764
37.32	0.0145442
37.34	0.019105
37.36	0.0134221
37.38	0.00676722
37.4	0.00201896
37.42	-0.00211239
37.44	-0.00648675
37.46	-0.00940274
37.48	-0.00695409
37.5	-0.0051034
37.52	-0.00265457
37.54	-0.00144875
37.56	6.5429e-05
37.58	-0.000140203
37.6	-0.000495391
37.62	-0.00107493
37.64	-0.000869266
37.66	-0.00032714
37.68	0.000158899
37.7	0.00144875
37.72	0.00502866
37.74	0.00800099
37.76	0.0118521
37.78	0.0143565
37.8	0.0123193
37.82	0.00949617
37.84	0.00530904
37.86	0.00052343
37.88	-0.00365466
37.9	-0.0091884
37.92	-0.00888896
37.94	-0.00432764
37.96	-0.000570164
37.98	0.00286955
38	0.00429027
38.02	0.00632791
38.04	0.00495391
38.06	0.0041874
38.08	0.00177594
38.1	-0.000205633
38.12	-0.0026171
38.14	-0.00263588
38.16	-0.00149555
38.18	-0.000570164
38.2	-0.000364531
38.22	-0.00159833
38.24	-0.00195355
38.26	-0.00337427
38.28	-0.00288824
38.3	-0.00065429
38.32	0.00142072
38.34	0.00383227
38.36	0.00618767
38.38	0.0058886
38.4	0.0049726
38.42	0.000570164
38.44	-0.00408463
38.46	-0.00709433
38.48	-0.00586057
38.5	-0.00606612
38.52	-0.00987998
38.54	-0.0150297
38.56	-0.0161326
38.58	-0.0109169
38.6	-0.006412
38.62	-0.00334624
38.64	-0.00219657
38.66	-0.000158899
38.68	0.000514078
38.7	0.00339296
38.72	0.00780469
38.74	0.0107767
38.76	0.00669239
38.78	0.00358925
38.8	-0.00078514
38.82	-0.00229934
38.84	-0.00302839
38.86	-0.00378555
38.88	-0.00404725
38.9	-0.00602875
38.92	-0.011057
38.94	-0.0108894
38.96	-0.00992669
38.98	-0.00910394
39	-0.00740275
39.02	-0.00704761
39.04	-0.0101136
39.06	-0.0128332
39.08	-0.0153384
39.1	-0.0133938
39.12	-0.011973
39.14	-0.0103096
39.16	-0.00990746
39.18	-0.00908525
39.2	-0.00897304
39.22	-0.00581376
39.24	0
39.26	0.00513143
39.28	0.0104781
39.3	0.0142914
39.32	0.0186095
39.34	0.0159741
39.36	0.0132912
39.38	0.00972059
39.4	0.00618767
39.42	0.00102812
39.44	-0.00604743
39.46	-0.00971143
39.48	-0.011188
39.5	-0.0127956
39.52	-0.0153009
39.54	-0.0199935
39.56	-0.0249189
39.58	-0.0254987
39.6	-0.0200586
39.62	-0.0165256
39.64	-0.0106091
39.66	-0.00558009
39.68	0.000233672
39.7	0.0051689
39.72	0.00948701
39.74	0.0135815
39.76	0.0177219
39.78	0.0218155
39.8	0.024732
39.82	0.0239653
39.84	0.0214701
39.86	0.0161234
39.88	0.0121233
39.9	0.00518758
39.92	-0.00414069
39.94	-0.0137867
39.96	-0.019367
39.98	-0.0235916
40	-0.023293
[truncated: 1,174 more rows]

## Sheet: 2500
0.02	5.04486e-05
0.04	0.000252243
0.06	5.04486e-05
0.08	0.000252243
0.1	3.36324e-05
0.12	0.000235433
0.14	3.36324e-05
0.16	0.000235433
0.18	3.36324e-05
0.2	0.000235433
0.22	3.36324e-05
0.24	0.000218607
0.26	1.68162e-05
0.28	0.000218607
0.3	1.68162e-05
0.32	0.000218607
0.34	1.68162e-05
0.36	0.000218607
0.38	0
0.4	0.000201798
0.42	0
0.44	0.000201798
0.46	0
0.48	0.000201798
0.5	-1.68162e-05
0.52	0.000184972
0.54	-1.68162e-05
0.56	0.000184972
0.58	-3.36324e-05
0.6	0.000168162
0.62	-3.36324e-05
0.64	0.000168162
0.66	-3.36324e-05
0.68	0.000168162
0.7	-5.04486e-05
0.72	0.000151347
0.74	-5.04486e-05
0.76	0.000151347
0.78	-6.72648e-05
0.8	0.000134531
0.82	-6.72648e-05
0.84	0.000134531
0.86	-6.72648e-05
0.88	0.000117715
0.9	-8.4081e-05
0.92	0.000117715
0.94	-8.4081e-05
0.96	0.000117715
0.98	-0.000100897
1	0.000100897
1.02	-0.000100897
1.04	0.000100897
1.06	-0.000117715
1.08	8.4081e-05
1.1	-0.000117715
1.12	8.4081e-05
1.14	-0.000134531
1.16	6.72648e-05
1.18	-0.000134531
1.2	5.04486e-05
1.22	-0.000151347
1.24	5.04486e-05
1.26	-0.000151347
1.28	3.36324e-05
1.3	-0.000168162
1.32	3.36324e-05
1.34	-0.000184972
1.36	1.68162e-05
1.38	-0.000184972
1.4	1.68162e-05
1.42	-0.000201798
1.44	0
1.46	-0.000201798
1.48	-1.68162e-05
1.5	-0.000218607
1.52	-1.68162e-05
1.54	-0.000235433
1.56	-3.36324e-05
1.58	-0.000235433
1.6	-5.04486e-05
1.62	-0.000252243
1.64	-5.04486e-05
1.66	-0.000269069
1.68	-6.72648e-05
1.7	-0.000269069
1.72	-6.72648e-05
1.74	-0.000285879
1.76	-8.4081e-05
1.78	-0.000302688
1.8	-0.000100897
1.82	-0.000302688
1.84	-0.000117715
1.86	-0.000319514
1.88	-0.000117715
1.9	-0.000336324
1.92	-0.000134531
1.94	-0.000336324
1.96	-0.000151347
1.98	-0.00035315
2	-0.000151347
2.02	-0.00036996
2.04	-0.000168162
2.06	-0.000386769
2.08	-0.000184972
2.1	-0.000386769
2.12	-0.000201798
2.14	-0.000403595
2.16	-0.000218607
2.18	-0.000420405
2.2	-0.000218607
2.22	-0.000437231
2.24	-0.000235433
2.26	-0.00045404
2.28	-0.000252243
2.3	-0.00045404
2.32	-0.000269069
2.34	-0.00047085
2.36	-0.000285879
2.38	-0.000487676
2.4	-0.000285879
2.42	-0.000504486
2.44	-0.000302688
2.46	-0.000521312
2.48	-0.000319514
2.5	-0.000538121
2.52	-0.000336324
2.54	-0.000554931
2.56	-0.00035315
2.58	-0.000554931
2.6	-0.00036996
2.62	-0.000571757
2.64	-0.000386769
2.66	-0.000588567
2.68	-0.000403595
2.7	-0.000605393
2.72	-0.000403595
2.74	-0.000622202
2.76	-0.000420405
2.78	-0.000639028
2.8	-0.000437231
2.82	-0.000655838
2.84	-0.00045404
2.86	-0.000672648
2.88	-0.00047085
2.9	-0.000689474
2.92	-0.000487676
2.94	-0.000706283
2.96	-0.000504486
2.98	-0.000723109
3	-0.000521312
3.02	-0.000739919
3.04	-0.000538121
3.06	-0.000756729
3.08	-0.000554931
3.1	-0.000756729
3.12	-0.000571757
3.14	-0.000773555
3.16	-0.000588567
3.18	-0.000790364
3.2	-0.000605393
3.22	-0.00080719
3.24	-0.000622202
3.26	-0.000824
3.28	-0.000639028
3.3	-0.00084081
3.32	-0.000655838
3.34	-0.000857636
3.36	-0.000672648
3.38	-0.000874445
3.4	-0.000689474
3.42	-0.000891271
3.44	-0.000706283
3.46	-0.000924891
3.48	-0.000723109
3.5	-0.000941717
3.52	-0.000739919
3.54	-0.000958526
3.56	-0.000756729
3.58	-0.000975352
3.6	-0.000773555
3.62	-0.000992162
3.64	-0.000790364
3.66	-0.00100897
3.68	-0.00080719
3.7	-0.0010258
3.72	-0.000824
3.74	-0.00104261
3.76	-0.00084081
3.78	-0.00105943
3.8	-0.000857636
3.82	-0.00107624
3.84	-0.000874445
3.86	-0.00109307
3.88	-0.000891271
3.9	-0.00110988
3.92	-0.000908081
3.94	-0.00112669
3.96	-0.000941717
3.98	-0.00114351
4	-0.000958526
4.02	-0.00116032
4.04	-0.000975352
4.06	-0.00117715
4.08	-0.000992162
4.1	-0.00119396
4.12	-0.00100897
4.14	-0.00121077
4.16	-0.0010258
4.18	-0.0012276
4.2	-0.00104261
4.22	-0.00126123
4.24	-0.00105943
4.26	-0.00127804
4.28	-0.00107624
4.3	-0.00129485
4.32	-0.00109307
4.34	-0.00131168
4.36	-0.00110988
4.38	-0.00132849
4.4	-0.00112669
4.42	-0.00134531
4.44	-0.00114351
4.46	-0.00136212
4.48	-0.00116032
4.5	-0.00137893
4.52	-0.00117715
4.54	-0.00139576
4.56	-0.00119396
4.58	-0.00141257
4.6	-0.0012276
4.62	-0.00142939
4.64	-0.0012444
4.66	-0.0014462
4.68	-0.00126123
4.7	-0.00146303
4.72	-0.00127804
4.74	-0.00147984
4.76	-0.00129485
4.78	-0.00149665
4.8	-0.00131168
4.82	-0.00151347
4.84	-0.00132849
4.86	-0.00153028
4.88	-0.00134531
4.9	-0.00154711
4.92	-0.00136212
4.94	-0.00156392
4.96	-0.00137893
4.98	-0.00158073
5	-0.00139576
5.02	-0.00408638
5.04	-0.019692
5.06	-0.0187328
5.08	-0.0163455
5.1	-0.0177407
5.12	-0.0217437
5.14	-0.025661
5.16	-0.023105
5.18	-0.0202968
5.2	-0.0158915
5.22	-0.01611
5.24	-0.0236439
5.26	-0.031429
5.28	-0.0342553
5.3	-0.0290921
5.32	-0.0258637
5.34	-0.0200281
5.36	-0.0154543
5.38	-0.00894633
5.4	-0.0127804
5.42	-0.0239125
5.44	-0.0336489
5.46	-0.0348601
5.48	-0.012814
5.5	0.0031279
5.52	0.0219794
5.54	-0.0101739
5.56	-0.0232566
5.58	-0.0261669
5.6	-0.0358868
5.62	-0.0456892
5.64	-0.0564193
5.66	-0.053443
5.68	-0.0307072
5.7	-0.0351123
5.72	-0.0292092
5.74	-0.02958
5.76	-0.0130831
5.78	0.00218607
5.8	0.0234082
5.82	0.0376519
5.84	0.0405441
5.86	0.0544516
5.88	0.0760091
5.9	0.0806844
5.92	0.0685931
5.94	0.0583029
5.96	0.043705
5.98	0.0374327
6	0.055124
6.02	0.0671988
6.04	0.087227
6.06	0.105355
6.08	0.121196
6.1	0.107524
6.12	0.0988124
6.14	0.0651471
6.16	0.0653317
6.18	0.00845869
6.2	-0.0885372
6.22	-0.134497
6.24	-0.103353
6.26	-0.0835437
6.28	-0.0439917
6.3	-0.0120909
6.32	0.020567
6.34	0.0496246
6.36	0.0819287
6.38	0.117209
6.4	0.165344
6.42	0.202803
6.44	0.255127
6.46	0.241465
6.48	0.192223
6.5	0.155029
6.52	0.147984
6.54	0.1535
6.56	0.139071
6.58	0.149296
6.6	0.164965
6.62	0.201072
6.64	0.0531233
6.66	-0.250282
6.68	-0.349458
6.7	-0.336719
6.72	-0.344086
6.74	-0.307632
6.76	-0.292141
6.78	-0.296871
6.8	-0.296838
6.82	-0.305786
6.84	-0.276155
6.86	-0.228792
6.88	-0.184856
6.9	-0.133773
6.92	-0.0742111
6.94	-0.00512891
6.96	0.058471
6.98	0.129737
7	0.193673
7.02	0.266449
7.04	0.327524
7.06	0.403332
7.08	0.456842
7.1	0.508276
7.12	0.536061
7.14	0.572334
7.16	0.472317
7.18	0.388532
7.2	-0.203544
7.22	-0.401337
7.24	-0.277869
7.26	-0.315905
7.28	-0.186208
7.3	-0.128913
7.32	-0.0311604
7.34	0.0167321
7.36	0.0875632
7.38	0.148236
7.4	0.197381
7.42	0.293196
7.44	0.094793
7.46	-0.444713
7.48	-0.262213
7.5	-0.293031
7.52	-0.172249
7.54	-0.0996364
7.56	0.0378035
7.58	-0.114923
7.6	-0.335022
7.62	-0.278215
7.64	-0.285401
7.66	-0.251304
7.68	-0.209049
7.7	-0.170568
7.72	-0.128325
7.74	-0.0901852
7.76	-0.0476074
7.78	-0.00963569
7.8	0.0295964
7.82	-0.0181956
7.84	-0.0748324
7.86	-0.14314
7.88	-0.161924
7.9	-0.122608
7.92	-0.102731
7.94	-0.0583689
7.96	-0.0201452
7.98	0.028924
8	0.0686441
8.02	0.111004
8.04	-0.0182796
8.06	-0.0647268
8.08	-0.00867721
8.1	-0.000302688
8.12	0.0558969
8.14	0.0928763
8.16	0.146555
8.18	0.187888
8.2	0.227292
8.22	0.0347085
8.24	0.0386275
8.26	0.112753
8.28	0.113964
8.3	0.219547
8.32	0.225644
8.34	0.340988
8.36	-0.158427
8.38	-0.222002
8.4	-0.118219
8.42	-0.0938684
8.44	0.0102748
8.46	0.111476
8.48	-0.181247
8.5	-0.252243
8.52	-0.181906
8.54	-0.197414
8.56	-0.129923
8.58	-0.0959713
8.6	-0.0379205
8.62	-0.0231396
8.64	-0.115091
8.66	-0.0564193
8.68	-0.0584035
8.7	-0.0202473
8.72	0.00116032
8.74	0.0483803
8.76	0.0803828
8.78	0.10036
8.8	0.0356677
8.82	-0.00723109
8.84	-0.042848
8.86	0.0111156
8.88	0.033868
8.9	0.0937003
8.92	0.137305
8.94	0.201023
8.96	0.246986
8.98	0.290328
9	0.069249
9.02	0.00314471
9.04	0.042024
9.06	0.0475563
9.08	-0.0107456
9.1	-0.026401
9.12	0.0225677
9.14	0.0329765
9.16	0.0824676
9.18	0.106835
9.2	0.159503
9.22	0.18807
9.24	0.241943
9.26	0.272365
9.28	0.325711
9.3	0.310549
9.32	0.332286
9.34	0.295948
9.36	0.2089
9.38	-0.204467
9.4	-0.0924231
9.42	-0.066037
9.44	-0.0535435
9.46	-0.189454
9.48	-0.280539
9.5	-0.415774
9.52	-0.341729
9.54	-0.309956
9.56	-0.222628
9.58	-0.162783
9.6	-0.0557799
9.62	0.0245849
9.64	0.136128
9.66	0.220535
9.68	0.304666
9.7	-0.0109979
9.72	-0.0294448
9.74	0.0467159
9.76	0.0741765
9.78	0.164128
9.8	0.238499
9.82	0.310467
9.84	0.412082
9.86	0.282253
9.88	-0.232961
9.9	-0.169068
9.92	-0.183983
9.94	-0.153567
9.96	-0.0796923
9.98	-0.211208
10	-0.355787
10.02	-0.272892
10.04	-0.285285
10.06	-0.220568
10.08	-0.187559
10.1	-0.130899
10.12	-0.0864524
10.14	-0.0923556
10.16	-0.20244
10.18	-0.204138
10.2	-0.195337
10.22	-0.193343
10.24	-0.121144
10.26	-0.0925731
10.28	0.0102244
10.3	-0.135927
10.32	-0.275265
10.34	-0.145125
10.36	-0.162059
10.38	-0.0672318
10.4	-0.0251402
10.42	0.0530392
10.44	0.108583
10.46	0.14674
10.48	0.0790364
10.5	0.0327754
10.52	-0.00484314
10.54	0.048616
10.56	0.0745638
10.58	0.131555
10.6	0.173501
10.62	0.226946
10.64	0.269893
10.66	0.312576
10.68	0.215262
10.7	0.107305
10.72	0.0342042
10.74	0.0525168
10.76	0.062657
10.78	0.0831564
10.8	0.0395009
10.82	-0.0143275
10.84	-0.0282352
10.86	-0.0191712
10.88	-0.0384594
10.9	-0.0418229
10.92	-0.0263004
10.94	-0.0116873
10.96	0.0248551
10.98	0.0636837
11	0.0975517
11.02	0.042881
11.04	-0.00667605
11.06	-0.0719401
11.08	-0.0220964
11.1	0.0160596
11.12	0.0389801
11.14	-0.0215756
11.16	-0.0080719
11.18	0.0136212
11.2	0.0357006
11.22	0.0641039
11.24	0.0861838
11.26	0.0266366
11.28	-0.00491038
11.3	-0.0183801
11.32	0.00134531
11.34	0.0131
11.36	0.0064239
11.38	-0.0156056
11.4	-0.00546526
11.42	-0.00228709
11.44	0.0070124
11.46	0.0147311
11.48	-0.00874445
11.5	-0.0506332
11.52	-0.0700911
11.54	-0.0405111
11.56	-0.0389472
11.58	-0.0292092
11.6	-0.0209032
11.62	-0.00242157
11.64	0.0349607
11.66	-0.0175232
11.68	-0.0144452
11.7	-0.00504486
11.72	-0.0169167
11.74	-0.0179434
11.76	-0.0157064
11.78	0.000420405
11.8	0.0132512
11.82	0.0403084
11.84	0.0607239
11.86	0.119396
11.88	0.132059
11.9	0.0318163
11.92	-0.0431331
11.94	-0.0199441
11.96	-0.0059361
11.98	0.0276798
12	0.0092321
12.02	-0.0358522
12.04	-0.077339
12.06	-0.0709645
12.08	-0.0350793
12.1	-0.0061716
12.12	0.028016
12.14	0.0549048
12.16	0.071772
12.18	0.0218113
12.2	-0.0255605
12.22	-0.0331446
12.24	-0.0124104
12.26	-0.0334478
12.28	-0.0216251
12.3	-0.00802131
12.32	0.0103588
12.34	0.0237955
12.36	0.0462116
12.38	0.0403084
12.4	0.0147984
12.42	-3.36324e-05
12.44	0.0351799
12.46	0.0744962
12.48	0.0843001
12.5	0.0334989
12.52	0.0170683
12.54	-0.00228709
12.56	-0.00190031
12.58	0.0101907
12.6	0.017304
12.62	0.0443444
12.64	0.063565
12.66	0.089783
12.68	0.0926918
12.7	0.0729998
12.72	0.0686771
12.74	0.095551
12.76	0.128897
12.78	0.0629602
12.8	0.0709151
12.82	0.0180769
12.84	-0.0324887
12.86	-0.0402409
12.88	-0.0662562
12.9	-0.0678037
12.92	-0.077339
12.94	-0.0711326
12.96	-0.0751356
12.98	-0.00788683
13	0.0318509
13.02	-0.0332632
13.04	-0.0808031
13.06	-0.087377
13.08	-0.0589242
13.1	-0.0663402
13.12	-0.0498273
13.14	-0.0513566
13.16	-0.0425629
13.18	-0.042764
13.2	-0.0432172
13.22	-0.0562001
13.24	-0.0499278
13.26	-0.0346591
13.28	-0.0110652
13.3	0.01648
13.32	0.049323
13.34	0.0539967
13.36	0.0622878
13.38	0.0592275
13.4	0.0622878
13.42	0.0501635
13.44	0.0533919
13.46	0.0207351
13.48	0.0381051
13.5	0.0247876
13.52	0.066711
13.54	-0.142855
13.56	-0.224721
13.58	-0.223749
13.6	-0.225545
13.62	-0.198666
13.64	-0.173073
13.66	-0.13744
13.68	-0.107305
13.7	-0.0726966
13.72	-0.0412165
13.74	-0.00812233
13.76	-0.0131168
13.78	-0.0286208
13.8	-0.0225331
13.82	0.0162783
13.84	0.0295964
13.86	0.0103925
13.88	0.0465807
13.9	0.0998556
13.92	0.148
13.94	0.203775
13.96	0.287246
13.98	0.188828
14	-0.18278
14.02	-0.0595472
14.04	-0.072629
14.06	-0.0377029
14.08	-0.159233
14.1	-0.108331
14.12	-0.0982076
14.14	-0.110685
14.16	-0.09064
14.18	-0.00255605
14.2	0.0657519
14.22	0.182252
14.24	0.282846
14.26	0.161219
14.28	0.07078
14.3	0.114132
14.32	0.0243673
14.34	-0.014008
14.36	-0.0852922
14.38	-0.13712
14.4	-0.191564
14.42	-0.191448
14.44	-0.1329
14.46	-0.060119
14.48	0.0070124
14.5	0.0935668
14.52	0.200216
14.54	0.272645
14.56	-0.0433028
14.58	0.00761772
14.6	-0.00733195
14.62	0.00524674
14.64	0.0266201
14.66	0.092171
14.68	0.136245
14.7	-0.0326238
14.72	-0.0971809
14.74	-0.0265872
14.76	-0.0274112
14.78	-0.0028924
14.8	0.0144452
14.82	0.066037
14.84	0.0973325
14.86	0.128409
14.88	0.136667
14.9	0.101301
14.92	0.0530722
14.94	0.0055999
14.96	0.0126795
14.98	-0.0665594
15	-0.0739408
15.02	-0.0116032
15.04	0.0301353
15.06	0.0970128
15.08	0.0174886
15.1	-0.00761772
15.12	0.0092321
15.14	-0.019069
15.16	-0.0456232
15.18	-0.0719072
15.2	-0.0574279
15.22	-0.041317
15.24	-0.0169167
15.26	0.0360039
15.28	0.088992
15.3	0.145108
15.32	0.194068
15.34	0.124727
15.36	0.0415197
15.38	-0.0604371
15.4	-0.0439406
15.42	-0.0350793
15.44	-0.145209
15.46	-0.162244
15.48	-0.0974841
15.5	-0.0551569
15.52	0.0144788
15.54	0.0448652
15.56	0.0869238
15.58	0.0619846
15.6	0.0150843
15.62	-0.00817276
15.64	-0.0337164
15.66	-0.0520966
15.68	-0.0386275
15.7	-0.0620686
15.72	-0.0911443
15.74	-0.120288
15.76	-0.133724
15.78	-0.0868562
15.8	-0.0558969
15.82	-0.000790364
15.84	0.0121751
15.86	-0.00521312
15.88	0.00035315
15.9	-0.027276
15.92	-0.0677872
15.94	-0.0125113
15.96	0.0143948
15.98	0.0637842
16	0.104496
16.02	0.112687
16.04	0.043756
16.06	-0.00877807
16.08	-0.0787167
16.1	-0.0590923
16.12	-0.0399047
16.14	-0.00734876
16.16	0.0220964
16.18	0.0644236
16.2	0.0413846
16.22	-0.0375348
16.24	-0.0711491
16.26	-0.113595
16.28	-0.110383
16.3	-0.0986608
16.32	-0.0855279
16.34	-0.0681069
16.36	-0.0512726
16.38	-0.0442603
16.4	-0.0903368
16.42	-0.105187
16.44	-0.152087
16.46	-0.185779
16.48	-0.147597
16.5	-0.129167
16.52	-0.0973671
16.54	-0.0792556
16.56	-0.0555442
16.58	-0.0332286
16.6	0.00378364
16.62	0.0356677
16.64	0.0730163
16.66	0.103219
16.68	0.1293
16.7	0.156997
16.72	0.179533
16.74	0.19008
16.76	0.199853
16.78	0.209692
16.8	0.224507
16.82	0.267998
16.84	0.302326
16.86	0.342471
16.88	0.207928
16.9	0.074193
16.92	-0.0235087
16.94	-0.112181
16.96	-0.0933312
16.98	-0.116772
17	-0.165525
17.02	-0.209823
17.04	-0.19837
17.06	-0.176896
17.08	-0.154861
17.1	-0.125316
17.12	-0.136245
17.14	-0.14336
17.16	-0.144856
17.18	-0.145596
17.2	-0.147092
17.22	-0.146487
17.24	-0.14916
17.26	-0.0908592
17.28	0.00835767
17.3	0.035549
17.32	0.0407798
17.34	0.0968793
17.36	0.0523322
17.38	0.0389801
17.4	0.0810371
17.42	0.0983081
17.44	0.0877132
17.46	0.0589078
17.48	0.0325233
17.5	0.0326238
17.52	0.0820803
17.54	0.0568049
17.56	0.0477244
17.58	0.071721
17.6	0.0394515
17.62	0.0138231
17.64	0.0121583
17.66	-0.0258967
17.68	-0.0137725
17.7	-0.00425448
17.72	0.0117377
17.74	0.00630607
17.76	-0.0252919
17.78	-0.0542835
17.8	-0.0414851
17.82	-0.00588567
17.84	0.0296129
17.86	0.0704092
17.88	0.0727806
17.9	0.084839
17.92	0.0772879
17.94	0.0792556
17.96	0.031345
17.98	0.0359874
18	0.0449162
18.02	0.0647087
18.04	0.0835602
18.06	0.095617
18.08	0.0976522
18.1	0.136768
18.12	0.132748
18.14	0.158091
18.16	0.0567044
18.18	0.00603712
18.2	-0.0220288
18.22	-0.0599163
18.24	-0.0730163
18.26	-0.0715529
18.28	-0.0476569
18.3	-0.0470356
18.32	0.0109979
18.34	0.0703086
18.36	-0.0403249
18.38	-0.066777
18.4	-0.0154711
18.42	0.0216432
18.44	0.0732849
18.46	0.00277474
18.48	-0.118791
18.5	-0.135657
18.52	-0.0438071
18.54	-0.0245189
18.56	0.0116537
18.58	-0.0211883
18.6	-0.0438731
18.62	-0.0578811
18.64	-0.0469169
18.66	-0.0525168
18.68	-0.035348
18.7	-0.0132008
18.72	-0.00812233
18.74	0.0157064
18.76	0.0480112
18.78	0.0558639
18.8	0.159149
18.82	0.149009
18.84	0.0282846
18.86	-0.0628926
18.88	-0.168986
18.9	-0.13776
18.92	-0.126964
18.94	-0.0927082
18.96	-0.0573603
18.98	-0.0236109
19	0.00332962
19.02	0.0227869
19.04	0.0835091
19.06	-0.00581843
19.08	-0.084165
19.1	-0.0623389
19.12	-0.118152
19.14	-0.0889244
19.16	-0.0643396
19.18	0.0126291
19.2	0.104312
19.22	0.13924
19.24	0.212592
19.26	0.231231
19.28	0.198617
19.3	0.124088
19.32	0.0358358
19.34	-0.0170189
19.36	-0.0401914
19.38	0.0102244
19.4	0.0284198
19.42	0.0892441
19.44	0.065063
19.46	0.00533079
19.48	-0.0158241
19.5	-0.0333638
19.52	-0.00541483
19.54	-0.0012444
19.56	-0.0217272
19.58	-0.0375678
19.6	-0.0530046
19.62	-0.0883526
19.64	-0.124307
19.66	-0.09962
19.68	-0.0467834
19.7	-0.0321871
19.72	0.00467488
19.74	0.0142267
19.76	0.0209873
19.78	0.0349112
19.8	0.0714359
19.82	0.0130495
19.84	-0.0942046
19.86	-0.095584
19.88	-0.0429156
19.9	-0.0158747
19.92	0.0399887
19.94	0.066711
19.96	0.0285714
19.98	-0.00677691
20	-0.0428991
20.02	-0.00475909
20.04	0.039519
20.06	0.0788354
20.08	0.129653
20.1	0.102377
20.12	0.0536605
20.14	-0.00455721
20.16	-0.0347926
20.18	-0.0437231
20.2	-0.0376354
20.22	-0.020684
20.24	0.00644071
20.26	0.0383588
20.28	-0.00766831
20.3	-0.0384759
20.32	-0.0811393
20.34	-0.0631794
20.36	-0.0347085
20.38	-0.00514572
20.4	0.0266877
20.42	-0.0155551
20.44	-0.00104261
20.46	0.0365922
20.48	0.0610271
20.5	0.098997
20.52	0.0849231
20.54	0.0706119
20.56	0.0560155
20.58	0.0829043
20.6	0.108012
20.62	0.112855
20.64	0.0271409
20.66	-0.030572
20.68	-0.0903879
20.7	-0.113611
20.72	-0.0668116
20.74	-0.0392669
20.76	-0.00726471
20.78	0.0181115
20.8	-0.0232071
20.82	-0.0609084
20.84	-0.0881004
20.86	-0.0581843
20.88	-0.0382913
20.9	-0.00383407
20.92	0.022281
20.94	0.00997205
20.96	-0.0121751
20.98	-0.0219448
21	-0.0556958
21.02	-0.0599163
21.04	-0.0168162
21.06	0.0105775
21.08	0.0504832
21.1	0.0777081
21.12	0.0999561
21.14	0.0952313
21.16	0.0540808
21.18	-0.0138735
21.2	-0.132041
21.22	-0.103808
21.24	-0.0750005
21.26	-0.0366762
21.28	0.00390131
21.3	0.0573603
21.32	0.0479931
21.34	0.0188844
21.36	0.0555953
21.38	0.051879
21.4	0.0415032
21.42	0.0332451
21.44	0.0321195
21.46	0.027899
21.48	0.00240476
21.5	-0.0255275
21.52	-0.0587726
21.54	-0.0582848
21.56	-0.0254435
21.58	-0.00595291
21.6	0.0275612
21.62	-0.017337
21.64	-0.0438566
21.66	-0.0480771
21.68	-0.0661886
21.7	-0.0418229
21.72	-0.037047
21.74	-0.0316812
21.76	-0.0301188
21.78	-0.00743281
21.8	-0.0053644
21.82	-0.032103
21.84	-0.021457
21.86	0.0136716
21.88	0.05694
21.9	0.115965
21.92	0.152339
21.94	0.142568
21.96	0.127148
21.98	0.0854439
22	0.0306726
22.02	0.00173205
22.04	-0.0325233
22.06	-0.0261323
22.08	-0.0127972
22.1	0.00282517
22.12	0.0212229
22.14	0.0354996
22.16	0.00359874
22.18	-0.0214751
22.2	-0.0557123
22.22	-0.0878483
22.24	-0.119412
22.26	-0.0979044
22.28	-0.0779949
22.3	-0.0521131
22.32	-0.0246524
22.34	-0.00195074
22.36	-0.030488
22.38	-0.0538797
22.4	-0.078364
22.42	-0.0661046
22.44	-0.0581513
22.46	-0.0534595
22.48	-0.0732355
22.5	-0.0828367
22.52	-0.079928
22.54	-0.0708475
22.56	-0.0607074
22.58	-0.0467669
22.6	-0.0433358
22.62	-0.0235087
22.64	-0.0113511
22.66	0.0851571
22.68	0.121548
22.7	0.147597
22.72	0.131672
22.74	0.128628
22.76	0.074043
22.78	0.0134867
22.8	0.00243838
22.82	-0.0211208
22.84	-0.00221969
22.86	0.00516269
22.88	0.0178248
22.9	0.0176402
22.92	0.032843
22.94	0.0346756
22.96	0.0128645
22.98	-0.00918167
23	-0.0116369
23.02	0.0120573
23.04	0.0183291
23.06	0.0250397
23.08	-0.000975352
23.1	-0.026368
23.12	-0.0308572
23.14	-0.000773555
23.16	0.0266877
23.18	0.018095
23.2	-0.0186834
23.22	-0.0503151
23.24	-0.0512561
23.26	-0.0154543
23.28	-0.00901357
23.3	0.0012276
23.32	0.00413681
23.34	0.00899676
23.36	0.0103925
23.38	0.0169348
23.4	0.0233917
23.42	0.0304369
23.44	0.0375513
23.46	0.0445965
23.48	0.0517109
23.5	0.0589242
23.52	0.0658689
23.54	0.0804834
23.56	0.0670802
23.58	0.0408308
23.6	0.0203643
23.62	-0.012444
23.64	-0.0197925
23.66	0.00995524
23.68	0.00563352
23.7	-0.0411324
23.72	-0.094053
23.74	-0.105001
23.76	-0.0982241
23.78	-0.0684925
23.8	-0.010258
23.82	0.0467323
23.84	0.047792
23.86	-0.00250562
23.88	-0.00884531
23.9	-0.0174391
23.92	-0.0358868
23.94	-0.0688798
23.96	-0.0859811
23.98	-0.036223
24	0.00637331
24.02	0.0144116
24.04	0.02472
24.06	0.0299161
24.08	0.0439241
24.1	0.0554931
24.12	0.0671478
24.14	0.0287889
24.16	-0.0214405
24.18	-0.0530887
24.2	-0.0474888
24.22	-0.047001
24.24	-0.0496592
24.26	-0.0557288
24.28	-0.0397036
24.3	-0.0114856
24.32	0.0225331
24.34	0.0645406
24.36	0.069132
24.38	0.0425448
24.4	0.0277803
24.42	-0.0053644
24.44	-0.0241646
24.46	-0.0472201
24.48	-0.0515593
24.5	-0.017271
24.52	0.0174045
24.54	0.0577476
24.56	0.0984762
24.58	0.0727312
24.6	0.0256791
24.62	0.000252243
24.64	-0.0210548
24.66	-0.0439571
24.68	-0.0556793
24.7	-0.0585716
24.72	-0.0649279
24.74	-0.0661211
24.76	-0.0803828
24.78	-0.0792391
24.8	-0.0665759
24.82	-0.0669451
24.84	-0.0573273
24.86	-0.0299491
24.88	-0.00787002
24.9	0.00891271
24.92	-0.00147984
24.94	-0.0105943
24.96	-0.0266877
24.98	-0.0178083
25	0.0229204
25.02	0.0617324
25.04	0.111711
25.06	0.121936
25.08	0.129872
25.1	0.125803
25.12	0.107356
25.14	0.0829389
25.16	0.046144
25.18	-0.00585205
25.2	-0.0466829
25.22	-0.0630278
25.24	-0.0809877
25.26	-0.0704273
25.28	-0.0682074
25.3	-0.0448652
25.32	-0.0069956
25.34	0.0414011
25.36	0.0733871
25.38	0.103117
25.4	0.0777592
25.42	0.0492884
25.44	0.0229204
25.46	-0.00755048
25.48	-0.0445125
25.5	-0.0696033
25.52	-0.0276963
25.54	0.00169843
25.56	0.0444449
25.58	0.0824
25.6	0.109508
25.62	0.094676
25.64	0.0711672
25.66	0.0324392
25.68	-0.00637331
25.7	-0.0494565
25.72	-0.0875961
25.74	-0.11758
25.76	-0.154373
25.78	-0.143645
25.8	-0.104429
25.82	-0.061767
25.84	0.0162951
25.86	0.0534084
25.88	0.100696
25.9	0.104699
25.92	0.0663748
25.94	0.0604552
25.96	0.0539292
25.98	0.0427804
26	0.00480952
26.02	-0.0319003
26.04	-0.0249721
26.06	-0.00114351
26.08	0.0182285
26.1	0.049473
26.12	0.0701751
26.14	0.0960388
26.16	0.0908411
26.18	0.0541483
26.2	0.0292767
26.22	-0.0027075
26.24	-0.0302688
26.26	-0.0451008
26.28	-0.060892
26.3	-0.0743957
26.32	-0.0883196
26.34	-0.079961
26.36	-0.0622713
26.38	-0.048532
26.4	-0.0315131
26.42	-0.0297151
26.44	-0.0253248
26.46	-0.0188004
26.48	-0.00751686
26.5	0.00151347
26.52	0.0113005
26.54	-0.0027075
26.56	-0.0174721
26.58	-0.0333292
26.6	-0.05282
26.62	-0.0641369
26.64	-0.056032
26.66	-0.0471691
26.68	-0.0538797
26.7	-0.0673669
26.72	-0.080635
26.74	-0.0936328
26.76	-0.107052
26.78	-0.0923045
26.8	-0.0737908
26.82	-0.00035315
26.84	0.0437396
26.86	0.0700911
26.88	0.109457
26.9	0.0983081
26.92	0.0808525
26.94	0.0654998
26.96	0.0658524
26.98	0.0580673
27	0.0611276
27.02	0.00221969
27.04	-0.0416548
27.06	-0.076515
27.08	-0.0781795
27.1	-0.0365081
27.12	-0.00992162
27.14	0.0283687
27.16	0.0606728
27.18	0.0855114
27.2	0.0633475
27.22	0.047825
27.24	0.0274952
27.26	0.00760091
27.28	-0.00364917
27.3	0.00420405
27.32	0.00827362
27.34	0.017304
27.36	0.0235433
27.38	0.0164296
27.4	0.0105607
27.42	0.0042881
27.44	-0.00442274
27.46	-0.00464126
27.48	0.00142939
27.5	-0.00366598
27.52	-0.0201287
27.54	-0.0390131
27.56	-0.067568
27.58	-0.0886393
27.6	-0.117209
27.62	-0.0538632
27.64	-0.00810552
27.66	0.0162277
27.68	0.0557799
27.7	0.080785
27.72	0.0861838
27.74	0.0605722
27.76	0.0580673
27.78	0.051795
27.8	0.0484644
27.82	0.0445471
27.84	0.028756
27.86	-0.000554931
27.88	-0.0351799
27.9	-0.0611276
27.92	-0.0516928
27.94	-0.0497086
27.96	-0.0466648
27.98	-0.0396525
28	-0.0443444
28.02	-0.0516269
28.04	-0.0611952
28.06	-0.0598834
28.08	-0.0514572
28.1	-0.0323371
28.12	0.00349772
28.14	0.033044
28.16	0.027192
28.18	0.0217602
28.2	0.0237955
28.22	0.0185318
28.24	0.0183801
28.26	0.0154879
28.28	0.0151684
28.3	0.00317833
28.32	-0.0218607
28.34	-0.0415873
28.36	-0.0731679
28.38	-0.0727131
28.4	-0.0503316
28.42	-0.0323881
28.44	-0.00797088
28.46	0.0161941
28.48	0.0283192
28.5	0.0247365
28.52	0.0291432
28.54	0.0129485
28.56	-0.00973671
28.58	-0.0363565
28.6	-0.0393509
28.62	0.00987119
28.64	0.0440247
28.66	0.0450003
28.68	0.0140752
28.7	-0.00716369
28.72	-0.0382402
28.74	-0.0130663
28.76	0.0051121
28.78	0.0302869
28.8	0.0520125
28.82	0.0802131
28.84	0.0770358
28.86	0.0275612
28.88	-0.00992162
28.9	-0.0669797
28.92	-0.0748489
28.94	-0.0409314
28.96	-0.017187
28.98	0.0360714
29	0.0436555
29.02	0.0199111
29.04	0.00109307
29.06	-0.0287049
29.08	-0.0645077
29.1	-0.095668
29.12	-0.131621
29.14	-0.104597
29.16	-0.0433523
29.18	0.00687793
29.2	0.0763634
29.22	0.131133
29.24	0.185153
29.26	0.159704
29.28	0.0818792
29.3	0.0199441
29.32	-0.0654487
29.34	-0.142855
29.36	-0.20656
29.38	-0.145899
29.4	-0.103992
29.42	-0.0389637
29.44	0.024804
29.46	0.0795753
29.48	0.0538797
29.5	0.0410484
29.52	0.0155215
29.54	0.0375002
29.56	0.0563682
29.58	0.0842491
29.6	0.0994008
29.62	0.0865876
29.64	0.092321
29.66	0.0993513
29.68	0.103252
29.7	0.098997
29.72	0.0778433
29.74	0.0258472
29.76	-0.0134867
29.78	-0.0394169
29.8	-0.0514918
29.82	-0.0560831
29.84	-0.061767
29.86	-0.0831564
29.88	-0.11156
29.9	-0.122356
29.92	-0.132412
29.94	-0.143056
29.96	-0.0957686
29.98	-0.0359363
30	0.0209362
30.02	0.0632634
30.04	0.081459
30.06	0.060236
30.08	0.0414357
30.1	0.0257451
30.12	0.0627756
30.14	0.0990646
30.16	0.10532
30.18	0.0613962
30.2	0.0358687
30.22	0.00588567
30.24	0.00322876
30.26	-0.0112669
30.28	-0.048733
30.3	-0.0647433
30.32	-0.077489
30.34	-0.08578
30.36	-0.131319
30.38	-0.106464
30.4	-0.0324392
30.42	0.0309247
30.44	0.0849396
30.46	0.124256
30.48	0.125299
30.5	0.0936509
30.52	0.0758591
30.54	0.0874116
30.56	0.106111
30.58	0.122053
30.6	0.142435
30.62	0.155013
30.64	0.163287
30.66	0.155349
30.68	0.136212
30.7	0.0435204
30.72	-0.0492719
30.74	-0.152389
30.76	-0.230044
30.78	-0.145327
30.8	-0.0793726
30.82	0.0127468
30.84	0.0992162
30.86	0.137524
30.88	0.0928269
30.9	0.0497432
30.92	-0.00252243
30.94	-0.0647763
30.96	-0.0590248
30.98	-0.00423767
31	0.0296129
31.02	0.105589
31.04	0.169695
31.06	0.187823
31.08	0.185499
31.1	0.157216
31.12	0.134716
31.14	0.101385
31.16	0.0847715
31.18	0.033784
31.2	-0.0344399
31.22	-0.0970309
31.24	-0.172331
31.26	-0.224837
31.28	-0.206643
31.3	-0.203808
31.32	-0.16981
31.34	-0.128981
31.36	-0.0927758
31.38	-0.0830559
31.4	-0.0687282
31.42	-0.0497597
31.44	-0.0302194
31.46	-0.0245354
31.48	-0.0170848
31.5	-0.00921529
31.52	0.00258967
31.54	0.0126459
31.56	0.00528036
31.58	-0.00566714
31.6	-0.0108465
31.62	-0.00650795
31.64	-0.00277474
31.66	0.01199
31.68	0.033901
31.7	0.0542159
31.72	0.075101
31.74	0.0962564
31.76	0.0939525
31.78	0.0772714
31.8	0.0498948
31.82	0.0172364
31.84	-0.00121077
31.86	-0.00628926
31.88	-0.0121413
31.9	-0.0177242
31.92	-0.0343394
31.94	-0.0323371
31.96	0.00368279
31.98	0.0218113
32	0.040343
32.02	0.0440247
32.04	0.0440593
32.06	0.0253594
32.08	-0.00368279
32.1	-0.0166646
32.12	-0.0368114
32.14	-0.0287724
32.16	-0.0206511
32.18	-0.0114351
32.2	-0.022164
32.22	-0.0280836
32.24	-0.0329089
32.26	-0.0413516
32.28	-0.0401403
32.3	-0.0300842
32.32	-0.0212889
32.34	-0.0317487
32.36	-0.0450003
32.38	-0.0549394
32.4	-0.0569236
32.42	-0.0769682
32.44	-0.0727312
32.46	-0.056772
32.48	-0.036223
32.5	-0.0122087
32.52	0.00465807
32.54	-8.4081e-05
32.56	-0.016026
32.58	-0.0155551
32.6	-0.0255951
32.62	-0.0281511
32.64	-0.0403925
32.66	-0.0548883
32.68	-0.0711491
32.7	-0.0774049
32.72	-0.0671132
32.74	-0.0592275
32.76	-0.0437231
32.78	-0.0294629
32.8	-0.00368279
32.82	0.0257121
32.84	0.0474393
32.86	0.0603531
32.88	0.0592275
32.9	0.0447317
32.92	0.0166811
32.94	-0.0080719
32.96	-0.021307
32.98	-0.0416878
33	-0.0387956
33.02	-0.0216597
33.04	-0.0117041
33.06	0.00255605
33.08	0.0153701
33.1	0.0331792
33.12	0.0478431
33.14	0.0609249
33.16	0.0520471
33.18	0.0300002
33.2	0.00380045
33.22	-0.0266712
33.24	-0.0538632
33.26	-0.0372481
33.28	-0.0200611
33.3	0.00210202
33.32	0.0255275
33.34	0.0497086
33.36	0.0406611
33.38	0.0224672
33.4	0.0169678
33.42	0.00364917
33.44	-0.00186669
33.46	-0.00425448
33.48	-0.00622202
33.5	-0.00844172
33.52	-0.0151347
33.54	-0.0264356
33.56	-0.0250562
33.58	-0.0131336
33.6	-0.000151347
33.62	-0.0037164
33.64	-0.0250397
33.66	-0.0381891
33.68	-0.0630278
33.7	-0.061716
33.72	-0.0423437
33.74	-0.0279155
33.76	-0.002472
33.78	0.0254089
33.8	0.0506678
33.82	0.0657684
33.84	0.0681563
33.86	0.0644401
33.88	0.0552245
33.9	0.0304715
33.92	0.0209197
33.94	0.0114688
33.96	-0.000252243
33.98	-0.0117209
34	-0.0219448
34.02	-0.0218113
34.04	-0.0194233
34.06	-0.0174391
34.08	-0.0141929
34.1	-0.02398
34.12	-0.0345404
34.14	-0.0455046
34.16	-0.0589242
34.18	-0.0606398
34.2	-0.0499954
34.22	-0.0384248
34.24	0.00297645
34.26	0.016396
34.28	0.0340872
34.3	0.0427969
34.32	0.0334313
34.34	0.0266712
34.36	0.0179599
34.38	0.0259988
34.4	0.0332632
34.42	0.04046
34.44	0.0236768
34.46	0.00901357
34.48	-0.0111156
34.5	-0.0165311
34.52	-0.00438912
34.54	0.002472
34.56	0.0167997
34.58	0.0155888
34.6	0.00654157
34.62	-0.000218607
34.64	-0.0111156
34.66	-0.0168492
34.68	-0.0183291
34.7	-0.0195403
34.72	-0.0220288
34.74	-0.0284527
34.76	-0.0334643
34.78	-0.0176913
34.8	-0.00168162
34.82	0.00904719
34.84	0.0216926
34.86	0.0334313
34.88	0.0334808
34.9	0.0282352
34.92	0.0240641
34.94	0.0181445
34.96	0.021541
34.98	0.0253759
35	0.0230555
35.02	0.0194909
35.04	0.0163287
35.06	0.00990481
35.08	-0.00469169
35.1	-0.00859317
35.12	-0.0141089
35.14	-0.0301188
35.16	-0.0539473
35.18	-0.0707964
35.2	-0.0870754
35.22	-0.0795407
35.24	-0.0662232
35.26	-0.0489357
35.28	-0.0184642
35.3	0.00824
35.32	0.0222315
35.34	0.0262329
35.36	0.0297991
35.38	0.0326238
35.4	0.0429156
35.42	0.0554931
35.44	0.0551915
35.46	0.0422086
35.48	0.0291251
35.5	0.00739919
35.52	-0.0142603
35.54	-0.0321195
35.56	-0.0384759
35.58	-0.0512891
35.6	-0.0465478
35.62	-0.0383407
35.64	-0.0292092
35.66	-0.020516
35.68	-0.0211389
35.7	-0.0218442
35.72	-0.0134027
35.74	-0.0045236
35.76	0.00660881
35.78	0.0107792
35.8	0.0092995
35.82	0.00825681
35.84	0.0108129
35.86	0.0210367
35.88	0.0301518
35.9	0.0407122
35.92	0.0516763
35.94	0.0499608
35.96	0.0422597
35.98	0.036172
36	0.0274606
36.02	0.032136
36.04	0.0394004
36.06	0.0472712
36.08	0.0506678
36.1	0.0328084
36.12	0.0178759
36.14	-0.00670967
36.16	-0.0273601
36.18	-0.0543
36.2	-0.0562841
36.22	-0.0369795
36.24	-0.024837
36.26	-0.00183291
36.28	0.00190031
36.3	-0.009064
36.32	-0.0169348
36.34	-0.02134
36.36	-0.0239965
36.38	-0.0218442
36.4	-0.0174391
36.42	-0.0120909
36.44	-0.00297645
36.46	0.00539802
36.48	0.0143444
36.5	0.0264191
36.52	0.040259
36.54	0.0534924
36.56	0.0574114
36.58	0.0533408
36.6	0.0358868
36.62	0.0121413
36.64	0.00158073
36.66	-0.00265691
36.68	-0.0078364
36.7	-0.0127468
36.72	-0.0202803
36.74	-0.026368
36.76	-0.0194398
36.78	-0.00955164
36.8	-0.000941717
36.82	-0.000639028
36.84	-0.000437231
36.86	0.00221969
36.88	0.00780279
36.9	0.0119732
36.92	0.0145293
36.94	0.0163455
36.96	0.0209197
36.98	0.0245849
37	0.0290081
37.02	0.0335154
37.04	0.0431331
37.06	0.0531908
37.08	0.0483474
37.1	0.038728
37.12	0.0177407
37.14	-0.000285879
37.16	-0.00176567
37.18	-0.0061716
37.2	-0.0088285
37.22	-0.0140752
37.24	-0.0086604
37.26	-0.00129485
37.28	0.00630607
37.3	0.016026
37.32	0.0261669
37.34	0.0343723
37.36	0.0241481
37.38	0.0121751
37.4	0.00363236
37.42	-0.00380045
37.44	-0.0116705
37.46	-0.0169167
37.48	-0.0125113
37.5	-0.00918167
37.52	-0.0047759
37.54	-0.00260648
37.56	0.000117715
37.58	-0.000252243
37.6	-0.000891271
37.62	-0.00193393
37.64	-0.00156392
37.66	-0.000588567
37.68	0.000285879
37.7	0.00260648
37.72	0.00904719
37.74	0.0143948
37.76	0.0213235
37.78	0.0258291
37.8	0.022164
37.82	0.0170848
37.84	0.00955164
37.86	0.000941717
37.88	-0.00657519
37.9	-0.0165311
37.92	-0.0159924
37.94	-0.00778598
37.96	-0.0010258
37.98	0.00516269
38	0.00771874
38.02	0.0113847
38.04	0.00891271
38.06	0.00753367
38.08	0.00319514
38.1	-0.00036996
38.12	-0.0047085
38.14	-0.00474228
38.16	-0.00269069
38.18	-0.0010258
38.2	-0.000655838
38.22	-0.0028756
38.24	-0.00351469
38.26	-0.00607074
38.28	-0.00519631
38.3	-0.00117715
38.32	0.00255605
38.34	0.00689474
38.36	0.0111324
38.38	0.0105943
38.4	0.00894633
38.42	0.0010258
38.44	-0.00734876
38.46	-0.0127636
38.48	-0.0105439
38.5	-0.0109137
38.52	-0.0177753
38.54	-0.0270404
38.56	-0.0290246
38.58	-0.0196409
38.6	-0.011536
38.62	-0.00602031
38.64	-0.0039519
38.66	-0.000285879
38.68	0.000924891
38.7	0.00610436
38.72	0.0140416
38.74	0.0193887
38.76	0.0120405
38.78	0.00645752
38.8	-0.00141257
38.82	-0.00413681
38.84	-0.00544845
38.86	-0.00681069
38.88	-0.00728152
38.9	-0.0108465
38.92	-0.019893
38.94	-0.0195914
38.96	-0.0178594
38.98	-0.0163791
39	-0.0133185
39.02	-0.0126795
39.04	-0.0181956
39.06	-0.0230885
39.08	-0.0275958
39.1	-0.0240971
39.12	-0.021541
39.14	-0.0185482
39.16	-0.0178248
39.18	-0.0163455
39.2	-0.0161436
39.22	-0.0104597
39.24	0
39.26	0.0092321
39.28	0.0188515
39.3	0.0257121
39.32	0.0334808
39.34	0.0287395
39.36	0.0239125
39.38	0.0174886
39.4	0.0111324
39.42	0.00184972
39.44	-0.0108801
39.46	-0.0174721
39.48	-0.0201287
39.5	-0.0230209
39.52	-0.0275282
39.54	-0.0359709
39.56	-0.0448322
39.58	-0.0458754
39.6	-0.0360879
39.62	-0.0297316
39.64	-0.0190871
39.66	-0.0100393
39.68	0.000420405
39.7	0.0092995
39.72	0.0170683
39.74	0.0244349
39.76	0.0318839
39.78	0.0392488
39.8	0.044496
39.82	0.0431166
39.84	0.0386275
39.86	0.0290081
39.88	0.0218113
39.9	0.00933312
39.92	-0.00744962
39.94	-0.024804
39.96	-0.0348437
39.98	-0.0424442
40	-0.041907
[truncated: 1,174 more rows]
